# Supplementary material
Source: MDPI journal article supplement (https://www.mdpi.com/2311-7524/10/5/529)
Supplement: s1 [file s1 › Supplement Figure.pdf]

Figure.S1

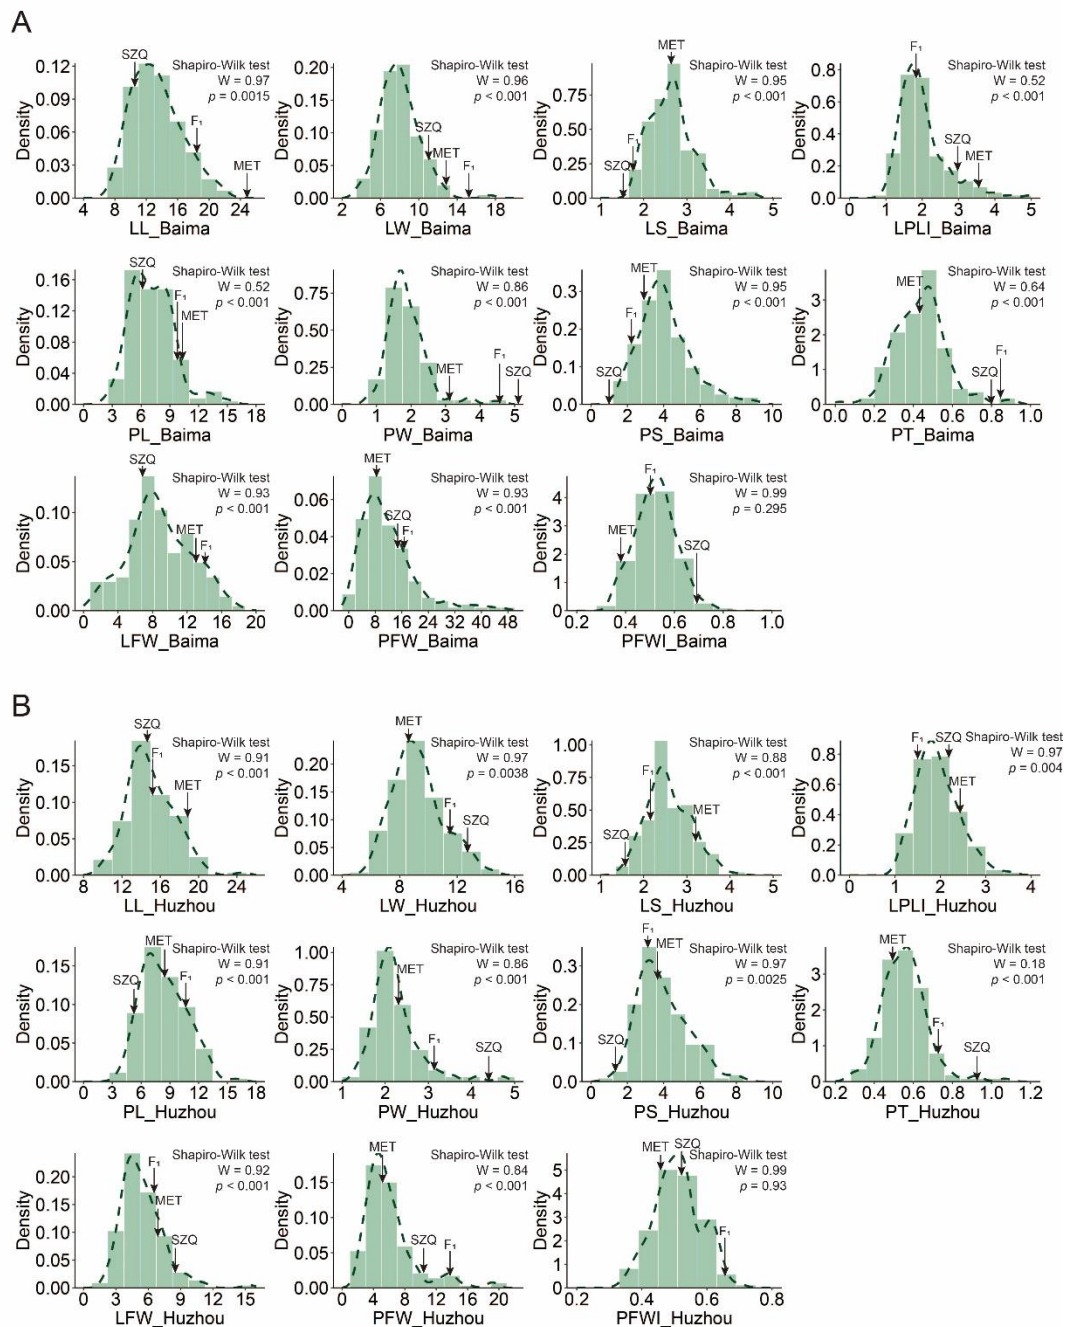

Figure S1 The distribution of 11 leaf-related traits in and RIL populations in Baima and Huzhou. The results of the normality test (Shapiro-Wilk test) are displayed at the upper right corner of each histogram. Arrows indicate the 11 leaf-related traits of each parent and F<sub>1</sub> hybrid. MET: the parental lines ‘Maertou’; SZQ: the parental lines ‘Suzhouqing’; F<sub>1</sub>: the F<sub>1</sub> hybrid.

Figure.S2

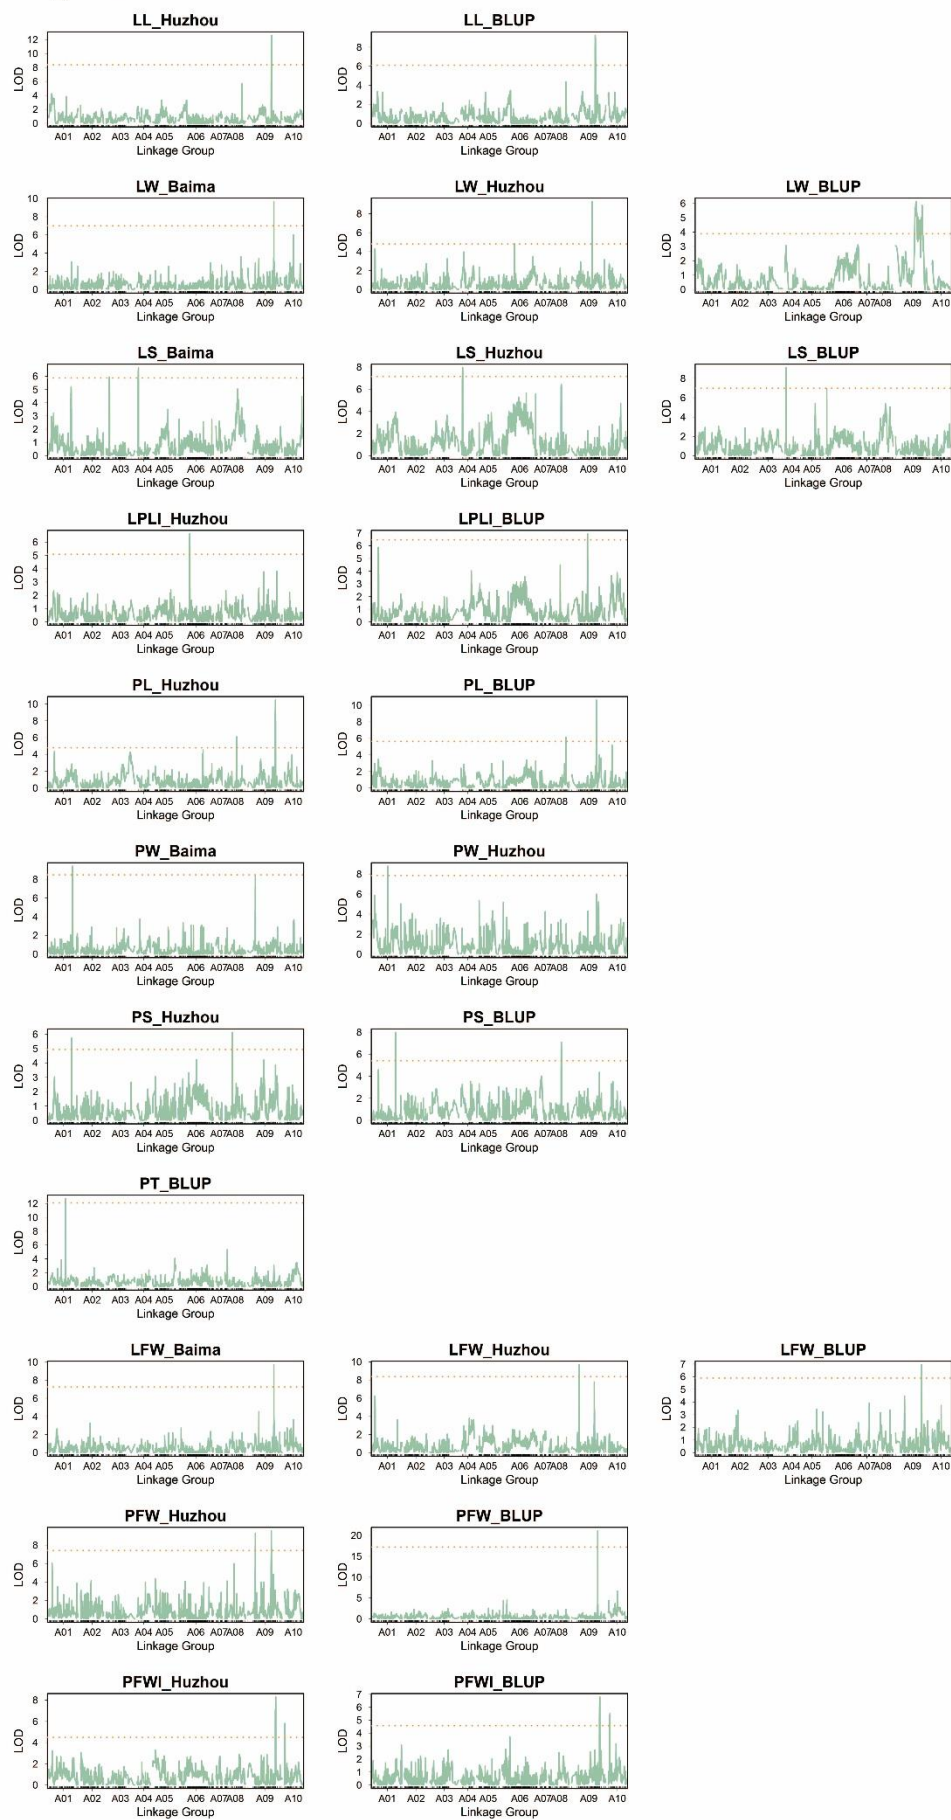

Figure S2 Overview of the significant QTL for the 11 leaf-related traits identified in the RIL population using CIM method.

Figure.S3

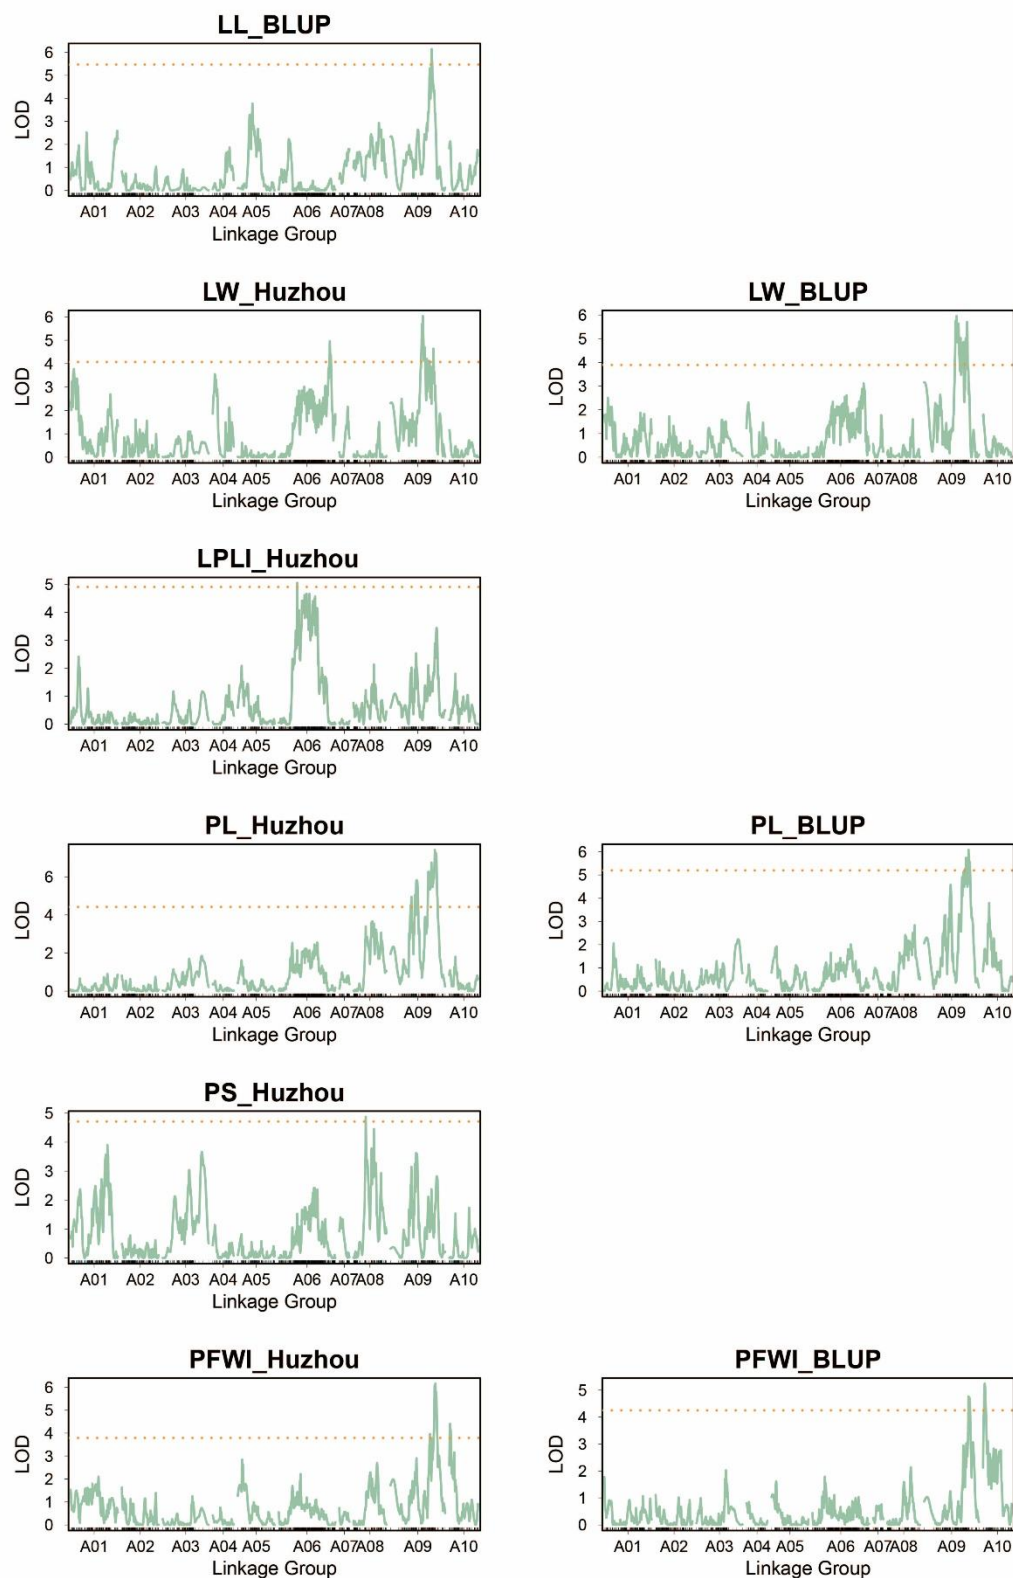

Figure S3 Overview of the significant QTL for the 11 leaf-related traits identified in the RIL population using MQM method.

Figure.S4

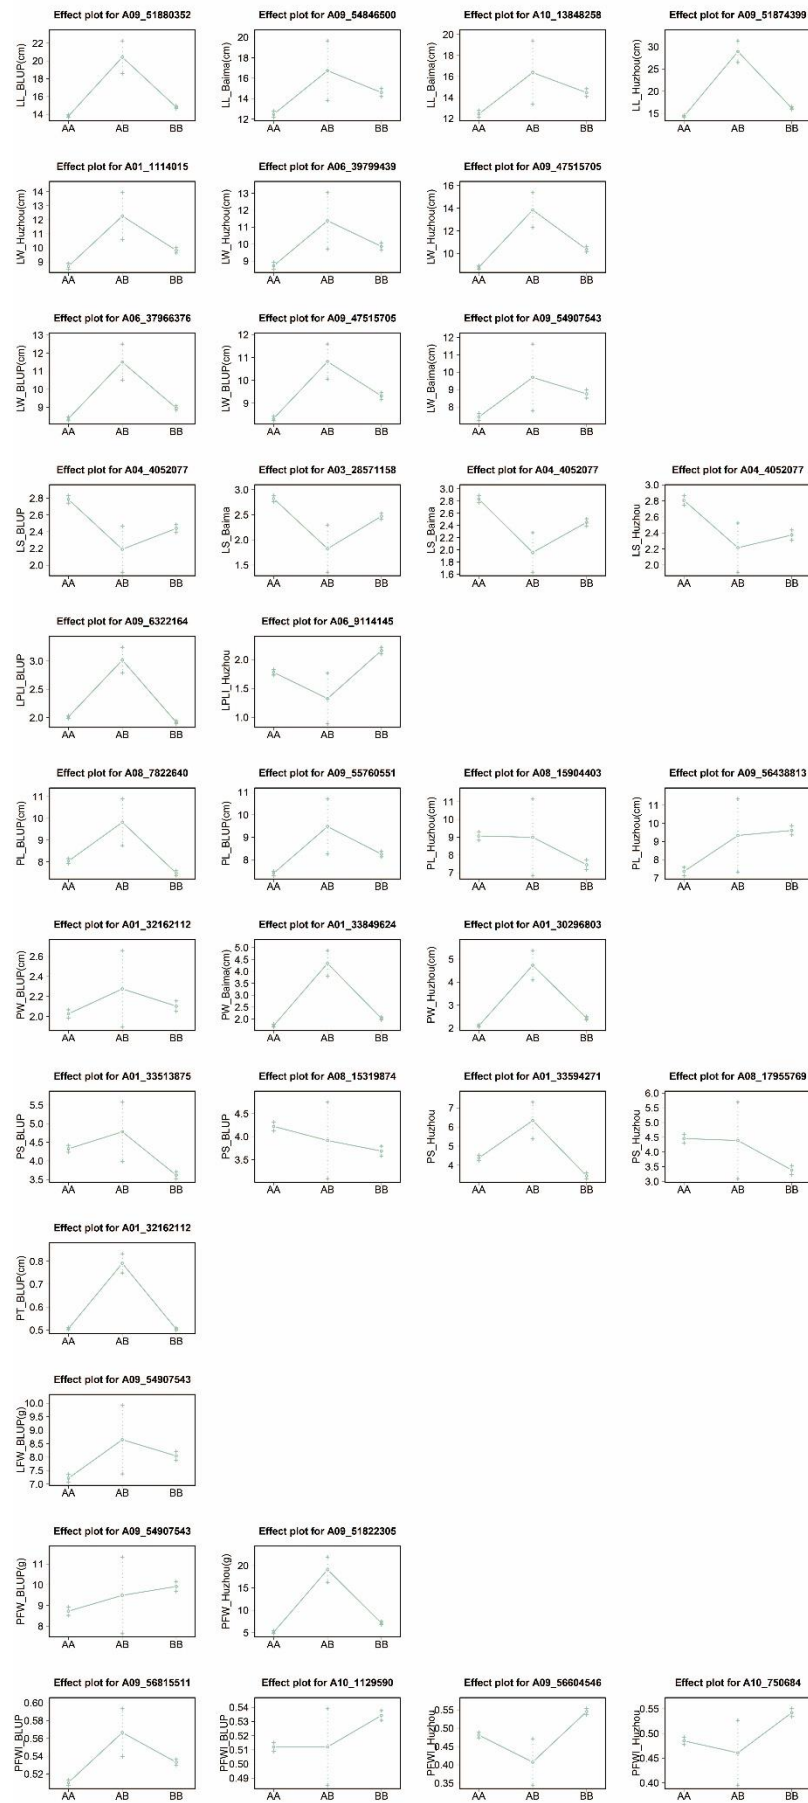

FigS4 Genotypic effects at peak marker locations of QTL for 11 leaf-related traits.  
AA and BB genotypes stand for genotype of MET and SZQ, respectively, Error bars are  $\pm 1$  SE.
