# Supplementary material
Source: MDPI journal article supplement (https://www.mdpi.com/2311-7524/10/5/529)
Supplement: s1 [file s1 › Supplement Table.xlsx]

## Sheet: Table S1 
Table S1 The descriptive statistics of five traits associated with leaf-related traits evaluated in RIL population
Traits	Environments	Parents and F1 Hybrid			T.test for parent significance	RIL population
		Maertou	Suzhouqing	F1 Hybrid		n	mean	sd	min	max	range	skew	kurtosis
LL	Baima	23.63±1.65	14.47±1.95	18.6±0.44	0.003	143	13.5072	3.2785	7.53333	23.6333	16.1	0.634966	-0.0737238
	Huzhou	18.83±2.52	14.73±0.64	15.2±2.26	0.052	143	15.2089	2.79712	9.83333	28.9333	19.1	1.42517	4.37616
	BLUP	21.88±3.77	14.43±0.55	17.24±2.20	0.000740102	144	14.2576	1.53434	11.2553	20.4719	9.21664	0.880022	1.33185
LW	Baima	10.53±1.01	11±1.35	15.5±0.80	0.657	143	8.12506	2.12392	3.56667	17.4333	13.8667	0.879523	2.12141
	Huzhou	8.77±1.12	12.83±0.21	11.95±2.19	0.003	143	9.38822	1.83119	5.83333	14.5	8.66667	0.566422	-0.203688
	BLUP	10.99±2.64	12.65±0.45	14.08±2.30	0.159014	144	8.6588	1.06522	6.4778	11.5033	5.0255	0.419445	-0.252254
LS	Baima	2.94±0.30	1.75±0.018	1.83±0.136	0.002	143	2.65666	0.520937	1.74569	4.54072	2.79503	0.877673	1.43388
	Huzhou	3.13±0.22	1.60±0.06	2.16±0.09	0	143	2.58198	0.554197	1.51571	5.18971	3.67399	0.913753	2.27295
	BLUP	2.90±0.36	1.62±0.09	1.96±0.21	6.83786e-06	144	2.61506	0.420886	1.88726	4.52842	2.64116	1.00081	2.5262
LPLI	Baima	3.49±1.15	3.06±0.26	1.94±0.15	0.555	149	2.03649	0.683269	0.986364	4.94763	3.96126	1.50105	2.58295
	Huzhou	2.23±0.36	2.53±0.22	1.45±0.02	0.271	143	1.93518	0.469201	1.08	3.5525	2.4725	0.651828	0.339422
	BLUP	2.40±0.48	2.40±0.23	1.74±0.29	0.977812	144	1.98146	0.24582	1.50391	3.01656	1.51265	1.05732	2.02688
PL	Baima	7.13±1.68	4.73±0.47	9.63±0.6;7	0.076	143	7.21113	2.30729	2.66667	15.2333	12.5667	0.770463	0.848114
	Huzhou	8.5±0.5	5.83±0.29	10.5±1.41	0.001	143	8.39054	2.30348	3.83333	15.8333	12	0.439185	-0.358061
	BLUP	9.23±1.43	6.03±0.43	9.98±0.97	0.000365987	144	7.76458	1.02282	5.76795	11.7341	5.96618	0.800459	0.903124
PW	Baima	2.43±0.25	3.23±0.45	4.63±0.15	0.056	142	1.93177	0.67439	0.77	4.63	3.86	1.83918	4.65939
	Huzhou	2.33±0.35	4.23±0.31	3.15±0.21	0.002	143	2.26791	0.595153	1.3	4.75	3.45	1.7104	3.97841
	BLUP	2.72±0.49	4.75±0.61	4.04±0.83	7.78148e-05	144	2.05564	0.387723	0.585031	3.81687	3.23184	1.19384	5.20834
PS	Baima	2.93±0.62	1.47±0.09	2.08±0.20	0.016	140	4.01993	1.42754	1.47	9.04	7.57	0.84443	0.958633
	Huzhou	3.69±0.47	1.38±0.04	3.36±0.67	0.001	143	3.9338	1.35991	1.17877	8.15741	6.97864	0.644878	0.0966531
	BLUP	3.46±0.59	1.28±0.12	2.59±0.79	4.48708e-06	144	3.99228	0.87345	2.1259	7.17149	5.04559	0.738675	0.850635
PT	Baima	0.56±0.05	0.80±0.09	0.82±0.00	0.014	141	0.466986	0.235669	0.03	2.57	2.54	5.29325	42.5092
	Huzhou	4.91±0.62	9.29±1.37	7.64±1.70	0.007	143	5.61779	1.20783	2.85	10.67	7.82	0.906491	2.1959
	BLUP	0.46±0.08	1.08±0.21	0.80±0.09	5.00961e-05	144	0.507204	0.0475315	0.423973	0.790576	0.366603	2.19053	9.78084
LFW	Baima	25.54±3.21	18.60±2.83	14.56±3.17	0.048	142	9.68452	4.77686	1.295	30.29	28.995	1.15967	2.43437
	Huzhou	20.9	26.35	14.15	NA	143	2.00534	5.19	15.36	13.28	1.24982	3.08127	0.164838
	BLUP	12.98±1.55	7.85±0.94	12.69±3.94	0.0059415	144	7.58206	1.34299	5.50758	12.3309	6.82332	1.19176	1.61436
PFW	Baima	26.08±6.49	24.25±6.75	15.82±1.28	0.752	142	12.672	11.1492	1.165	98.405	97.24	3.7009	22.6398
	Huzhou	17.22	28.89	27.4	NA	143	3.24428	5.3275	19.21	17.4667	1.67749	3.13061	0.266678
	BLUP	7.77±1.67	14.76±3.69	15.29±1.29	0.0242331	144	9.24304	1.94773	7.22466	22.991	15.7663	3.32421	17.8143
PFWI	Baima	0.50±0.03	0.56±0.03	0.52±0.03	0.08	142	0.523532	0.0839871	0.351916	0.760167	0.408251	0.199038	-0.179764
	Huzhou	5.74	9.63	13.7	NA	143	0.0719335	0.510243	0.701727	0.361807	0.117748	-0.404363	0.0059129
	BLUP	0.41±0.04	0.64±0.08	0.57±0.05	0.0034934	144	0.521571	0.0293162	0.452494	0.604058	0.151563	0.119109	-0.0456668

## Sheet: Table S2 
Table S2 Information of samples in RIL population and parent lines after re-sequenced
Sample	Raw Reads Number	Raw Bases Number	Clean Reads Number	Clean Reads Rate(%)	Clean Bases Number	Low-quality Reads Number	Low-quality Reads Rate(%)	Ns Reads Number	Ns Reads Rate(%)	Adapter Polluted Reads Number	Adapter Polluted Reads Rate(%)	Raw Q30 Bases Rate(%)	Clean Q30 Bases Rate(%)
1	39047878	5857181700	37918172	97.11	5687725800	179216	0.46	36264	0.1	914226	2.34	92.06	92.29
2	36038952	5405842800	35136588	97.5	5270488200	120922	0.34	31878	0.09	749564	2.08	92.22	92.39
3	41067882	6160182300	39834456	97	5975168400	199478	0.49	42162	0.11	991786	2.42	91.76	92
4	35866190	5379928500	34758320	96.91	5213748000	149480	0.42	35992	0.1	922398	2.57	92	92.22
6	39484214	5922632100	38267608	96.92	5740141200	164996	0.42	39798	0.1	1011812	2.56	92.17	92.37
7	37073294	5560994100	36105722	97.39	5415858300	135712	0.37	30188	0.08	801672	2.16	92.56	92.75
8	37396828	5609524200	36230992	96.88	5434648800	181340	0.48	41534	0.12	942962	2.52	91.69	91.93
10	38090332	5713549800	37007282	97.16	5551092300	175814	0.46	38748	0.11	868488	2.28	91.8	92.03
11	38916504	5837475600	37599238	96.61	5639885700	145154	0.37	39160	0.1	1132952	2.91	92.38	92.57
12	36628092	5494213800	35424402	96.71	5313660300	166866	0.46	33938	0.1	1002886	2.74	92.03	92.26
13	33164556	4974683400	32307980	97.42	4846197000	131772	0.4	31108	0.1	693696	2.09	91.86	92.06
15	35002452	5250367800	34000472	97.14	5100070800	135702	0.39	29920	0.09	836358	2.39	92.31	92.52
16	38406040	5760906000	37251272	96.99	5587690800	149472	0.39	40888	0.11	964408	2.51	92.63	92.84
17	32445588	4866838200	31450494	96.93	4717574100	143422	0.44	33702	0.11	817970	2.52	90.33	90.52
18	35997280	5399592000	35000288	97.23	5250043200	143504	0.4	33946	0.1	819542	2.28	92.41	92.61
19	34205170	5130775500	33280172	97.3	4992025800	148874	0.43	32284	0.1	743840	2.17	91.99	92.2
20	38711160	5806674000	37633322	97.22	5644998300	152770	0.4	37576	0.1	887492	2.29	92.13	92.33
21	39825610	5973841500	38346724	96.29	5752008600	144638	0.36	43120	0.11	1291128	3.24	92.15	92.34
23	34780706	5217105900	33500614	96.32	5025092100	164640	0.47	35340	0.11	1080112	3.1	90.85	91.06
24	40690048	6103507200	39671728	97.5	5950759200	165316	0.41	35128	0.09	817876	2.01	92.41	92.62
25	35380054	5307008100	34427780	97.31	5164167000	146152	0.41	30898	0.09	775224	2.19	92.13	92.33
26	31384694	4707704100	30386544	96.82	4557981600	138550	0.44	32506	0.11	827094	2.63	91.7	91.93
27	34280658	5142098700	33276196	97.07	4991429400	140116	0.41	30140	0.09	834206	2.43	92.46	92.66
28	35583910	5337586500	34689916	97.49	5203487400	140966	0.4	33420	0.1	719608	2.02	91.86	92.06
29	38946710	5842006500	37887560	97.28	5683134000	184312	0.47	38078	0.1	836760	2.15	91.73	91.96
30	36416736	5462510400	35124500	96.45	5268675000	172010	0.47	35192	0.1	1085034	2.98	91.72	91.95
31	38411414	5761712100	37069510	96.51	5560426500	157118	0.41	36342	0.1	1148444	2.99	91.82	92.03
32	36320842	5448126300	35341640	97.3	5301246000	159378	0.44	33334	0.09	786490	2.17	91.86	92.08
33	40694750	6104212500	39689758	97.53	5953463700	170276	0.42	44124	0.11	790592	1.94	91.24	91.44
34	38213136	5731970400	37214622	97.39	5582193300	163872	0.43	32510	0.09	802132	2.1	92.03	92.25
35	29607952	4441192800	28642500	96.74	4296375000	134554	0.45	27732	0.09	803166	2.71	90.05	90.24
38	32510024	4876503600	31751872	97.67	4762780800	144658	0.45	31406	0.1	582088	1.79	91.15	91.36
39	35897054	5384558100	34950656	97.36	5242598400	160748	0.45	35664	0.1	749986	2.09	91.44	91.65
40	35495388	5324308200	34529748	97.28	5179462200	156820	0.44	34768	0.1	774052	2.18	91.69	91.92
41	32815038	4922255700	31916212	97.26	4787431800	94568	0.29	32144	0.1	772114	2.35	91.95	92.11
42	34649594	5197439100	33357668	96.27	5003650200	159890	0.46	34170	0.1	1097866	3.17	91.87	92.1
44	36144494	5421674100	34864460	96.46	5229669000	136736	0.38	36094	0.1	1107204	3.06	91.73	91.92
45	37472688	5620903200	36551334	97.54	5482700100	178662	0.48	37534	0.1	705158	1.88	91.75	91.99
46	33396718	5009507700	32573462	97.53	4886019300	140186	0.42	29390	0.09	653680	1.96	91.77	91.98
47	35060834	5259125100	33820162	96.46	5073024300	148582	0.42	35680	0.1	1056410	3.01	92.14	92.36
48	36144276	5421641400	35195134	97.37	5279270100	154658	0.43	34808	0.1	759676	2.1	91.92	92.13
49	38271996	5740799400	37208024	97.22	5581203600	153510	0.4	35400	0.1	875062	2.29	92.2	92.41
50	34121570	5118235500	33252504	97.45	4987875600	139962	0.41	31494	0.1	697610	2.04	92.02	92.22
51	35124568	5268685200	34236188	97.47	5135428200	151110	0.43	28988	0.09	708282	2.02	91.7	91.9
52	39447054	5917058100	38054828	96.47	5708224200	133910	0.34	37034	0.1	1221282	3.1	92.31	92.48
53	37797134	5669570100	36693000	97.08	5503950000	167380	0.44	33434	0.09	903320	2.39	91.65	91.86
54	39603860	5940579000	38625112	97.53	5793766800	126666	0.32	42892	0.11	809190	2.04	91.78	91.95
55	40264796	6039719400	39231038	97.43	5884655700	176950	0.44	36818	0.09	819990	2.04	91.43	91.64
56	32464730	4869709500	31453660	96.89	4718049000	135472	0.42	29870	0.1	845728	2.6	92.22	92.43
57	31246764	4687014600	30383886	97.24	4557582900	139794	0.45	28774	0.1	694310	2.22	91.6	91.82
58	31789582	4768437300	30849844	97.04	4627476600	123316	0.39	27540	0.09	788882	2.48	92.31	92.52
59	35010932	5251639800	34014710	97.16	5102206500	146104	0.42	30636	0.09	819482	2.34	92.06	92.27
60	38018452	5702767800	36808680	96.82	5521302000	181042	0.48	41624	0.1	987106	2.6	90.27	90.48
61	33911342	5086701300	33082756	97.56	4962413400	108228	0.32	31546	0.1	688812	2.03	91.73	91.9
62	39321378	5898206700	37098598	94.35	5564789700	160742	0.41	48232	0.12	2013806	5.12	90.82	91.02
63	40884492	6132673800	39721132	97.16	5958169800	190672	0.47	40994	0.1	931694	2.28	91.37	91.58
64	38162922	5724438300	36884836	96.65	5532725400	158330	0.41	37092	0.1	1082664	2.84	92	92.21
65	31764586	4764687900	30985532	97.55	4647829800	139218	0.44	25690	0.08	614146	1.93	91.67	91.88
66	30194692	4529203800	29265002	96.92	4389750300	121086	0.4	27502	0.09	781102	2.59	91.51	91.71
67	40393320	6058998000	39485730	97.75	5922859500	162606	0.4	35362	0.09	709622	1.76	91.73	91.92
68	36683310	5502496500	35722450	97.38	5358367500	169620	0.46	37698	0.11	753542	2.05	91.59	91.81
69	32312010	4846801500	31461226	97.37	4719183900	140100	0.43	34328	0.11	676356	2.09	91.89	92.11
70	33319728	4997959200	32426448	97.32	4863967200	134860	0.41	30828	0.1	727592	2.18	91.76	91.97
72	40840484	6126072600	39110984	95.77	5866647600	132294	0.32	39544	0.1	1557662	3.81	92.11	92.28
73	38638712	5795806800	37616394	97.35	5642459100	165480	0.43	38578	0.1	818260	2.12	92.06	92.28
74	38813930	5822089500	37762848	97.29	5664427200	167284	0.43	35346	0.09	848452	2.19	91.84	92.05
76	37188366	5578254900	36177114	97.28	5426567100	145106	0.39	30184	0.09	835962	2.25	92.25	92.44
78	38818138	5822720700	37632048	96.94	5644807200	172564	0.45	36752	0.1	976774	2.52	91.76	91.98
79	40954138	6143120700	39775300	97.12	5966295000	152920	0.37	35672	0.09	990246	2.42	92.83	93.04
80	34215912	5132386800	33237842	97.14	4985676300	163090	0.48	29064	0.09	785916	2.3	91.78	92
81	38873626	5831043900	37682658	96.94	5652398700	167096	0.43	34022	0.09	989850	2.55	92.04	92.25
82	30341920	4551288000	29203756	96.25	4380563400	114844	0.38	25882	0.09	997438	3.29	91.95	92.14
83	39690558	5953583700	38750312	97.63	5812546800	194440	0.49	35916	0.09	709890	1.79	91.5	91.74
84	37623082	5643462300	36762572	97.71	5514385800	154392	0.41	29658	0.08	676460	1.8	92.07	92.27
85	34387120	5158068000	33562030	97.6	5034304500	141174	0.41	28914	0.09	655002	1.91	92.19	92.4
86	34723744	5208561600	33682158	97	5052323700	171438	0.49	33762	0.1	836386	2.41	90.75	90.97
87	31774754	4766213100	30928262	97.34	4639239300	125474	0.4	25610	0.08	695408	2.19	92.02	92.22
88	31713022	4756953300	30426002	95.94	4563900300	119348	0.38	22696	0.08	1144976	3.61	91.62	91.8
89	35522546	5328381900	34550066	97.26	5182509900	144358	0.41	28014	0.08	800108	2.25	92.04	92.24
90	33223798	4983569700	31428476	94.6	4714271400	127314	0.38	37348	0.12	1630660	4.91	91.62	91.85
91	37354074	5603111100	36443818	97.56	5466572700	173518	0.47	36482	0.1	700256	1.88	91.75	91.98
93	36903766	5535564900	36032150	97.64	5404822500	155358	0.42	30064	0.09	686194	1.86	92.02	92.23
94	35103088	5265463200	34319054	97.77	5147858100	136698	0.39	28154	0.08	619182	1.76	92.16	92.36
95	34046416	5106962400	33032398	97.02	4954859700	135664	0.4	28888	0.09	849466	2.5	92.23	92.44
96	38448088	5767213200	37386898	97.24	5608034700	161024	0.42	30804	0.08	869362	2.26	91.95	92.15
97	33003360	4950504000	32084328	97.22	4812649200	150786	0.46	26002	0.08	742244	2.25	91.49	91.71
98	30980862	4647129300	30085632	97.11	4512844800	94372	0.3	35718	0.12	765140	2.47	92.05	92.22
99	37305452	5595817800	36340992	97.42	5451148800	146038	0.39	30114	0.08	788308	2.11	91.77	91.96
100	34488132	5173219800	33142970	96.1	4971445500	130720	0.38	33158	0.1	1181284	3.42	91.43	91.62
101	39233916	5885087400	38410934	97.9	5761640100	179836	0.46	33640	0.09	609506	1.55	91.57	91.8
103	32827468	4924120200	32080380	97.72	4812057000	128686	0.39	26172	0.08	592230	1.8	92.26	92.46
104	35011178	5251676700	34213018	97.72	5131952700	131332	0.38	28376	0.08	638452	1.82	92.58	92.78
105	41090258	6163538700	39995644	97.34	5999346600	223278	0.54	47912	0.12	823424	2	90.74	90.99
106	37900080	5685012000	37156612	98.04	5573491800	148272	0.39	28356	0.08	566840	1.5	92.37	92.57
107	34793604	5219040600	33961664	97.61	5094249600	144312	0.41	27644	0.08	659984	1.9	91.76	91.96
108	38912334	5836850100	37918176	97.44	5687726400	166784	0.43	30000	0.08	797374	2.05	91.9	92.1
109	28806152	4320922800	27964866	97.08	4194729900	91714	0.32	30276	0.11	719296	2.5	91.86	92.03
110	38034906	5705235900	36257872	95.33	5438680800	134150	0.35	39936	0.11	1602948	4.21	92.02	92.2
111	36009732	5401459800	35231880	97.84	5284782000	163248	0.45	30834	0.09	583770	1.62	91.66	91.88
113	39896702	5984505300	38948644	97.62	5842296600	174984	0.44	33720	0.09	739354	1.85	91.84	92.05
114	39606088	5940913200	38669594	97.64	5800439100	179790	0.45	34588	0.09	722116	1.82	91.94	92.17
116	37072154	5560823100	36004540	97.12	5400681000	175482	0.47	32996	0.08	859136	2.32	91.36	91.59
117	34739514	5210927100	33843330	97.42	5076499500	138622	0.4	30536	0.09	727026	2.09	92.1	92.31
118	33263842	4989576300	32253360	96.96	4838004000	136750	0.41	27604	0.09	846128	2.54	91.96	92.18
119	38260076	5739011400	36951450	96.58	5542717500	143750	0.38	36610	0.1	1128266	2.95	92.15	92.34
120	35380432	5307064800	34166122	96.57	5124918300	133160	0.38	30176	0.09	1050974	2.97	92.16	92.34
122	38185946	5727891900	36944496	96.75	5541674400	135608	0.35	36706	0.1	1069136	2.8	91.65	91.82
123	39592836	5938925400	37996486	95.97	5699472900	145734	0.37	38092	0.1	1412524	3.57	92.11	92.3
124	38199668	5729950200	36887992	96.57	5533198800	127250	0.33	37816	0.1	1146610	3	92.22	92.41
125	34401998	5160299700	33394598	97.07	5009189700	109516	0.32	28586	0.09	869298	2.53	92.44	92.6
126	36278362	5441754300	34987998	96.44	5248199700	124190	0.34	41288	0.12	1124886	3.1	91.91	92.08
128	34415842	5162376300	33499658	97.34	5024948700	113480	0.33	29482	0.09	773222	2.25	91.91	92.07
129	35578546	5336781900	34559060	97.14	5183859000	127286	0.36	57988	0.17	834212	2.34	92.53	92.74
130	35837352	5375602800	34455358	96.14	5168303700	146460	0.41	32496	0.09	1203038	3.36	92.06	92.27
131	33200864	4980129600	32218970	97.04	4832845500	116100	0.35	31612	0.1	834182	2.51	91.94	92.12
132	33995462	5099319300	33001500	97.08	4950225000	106568	0.31	29972	0.09	857422	2.52	92.27	92.44
133	36167424	5425113600	35145572	97.17	5271835800	110774	0.31	33244	0.1	877834	2.43	92.48	92.65
134	30923930	4638589500	29966948	96.91	4495042200	97690	0.32	32774	0.11	826518	2.67	92.1	92.28
135	31589594	4738439100	30843254	97.64	4626488100	92002	0.29	35232	0.12	619106	1.96	92.23	92.4
136	30143430	4521514500	29212206	96.91	4381830900	89542	0.3	33020	0.11	808662	2.68	92.22	92.39
137	34090354	5113553100	33076398	97.03	4961459700	143256	0.42	32982	0.1	837718	2.46	92.09	92.3
138	37389388	5608408200	36094808	96.54	5414221200	157520	0.42	52878	0.14	1084182	2.9	92.27	92.49
139-1	34373844	5156076600	33386054	97.13	5007908100	116278	0.34	27778	0.09	843734	2.46	92.52	92.7
139-2	37671742	5650761300	36799880	97.69	5519982000	127098	0.34	30190	0.08	714574	1.9	92.17	92.35
140	32645864	4896879600	31761952	97.29	4764292800	113634	0.35	32732	0.11	737546	2.26	91.82	92.01
141	32651564	4897734600	31748996	97.24	4762349400	84540	0.26	38990	0.12	779038	2.39	92.35	92.5
142	30899674	4634951100	29996630	97.08	4499494500	110180	0.36	31586	0.11	761278	2.46	91.71	91.89
143	32861142	4929171300	32035892	97.49	4805383800	111358	0.34	29908	0.09	683984	2.08	91.94	92.11
145	31595344	4739301600	30783878	97.43	4617581700	98842	0.31	36414	0.12	676210	2.14	91.75	91.92
146	37396572	5609485800	36434726	97.43	5465208900	155150	0.41	35526	0.1	771170	2.06	91.52	91.72
148	34173378	5126006700	33220060	97.21	4983009000	127740	0.37	31830	0.1	793748	2.32	91.87	92.07
149	38679774	5801966100	37635330	97.3	5645299500	123046	0.32	37984	0.1	883414	2.28	91.97	92.15
150	39913372	5987005800	38835162	97.3	5825274300	146150	0.37	37786	0.09	894274	2.24	90.08	90.24
151	31466428	4719964200	30567632	97.14	4585144800	107156	0.34	34500	0.11	757140	2.41	91.15	91.34
152	31394208	4709131200	30582670	97.42	4587400500	106016	0.34	30640	0.1	674882	2.15	91.44	91.62
153	28534218	4280132700	27798308	97.42	4169746200	96450	0.34	23930	0.09	615530	2.16	91.88	92.05
155	32056572	4808485800	30826148	96.16	4623922200	107742	0.34	28660	0.09	1094022	3.41	92	92.17
156	31861050	4779157500	30777452	96.6	4616617800	116724	0.37	67712	0.22	899162	2.82	92	92.22
157	34729762	5209464300	33815090	97.37	5072263500	133982	0.39	31036	0.09	749654	2.16	91.76	91.95
158	30700524	4605078600	29934464	97.5	4490169600	109606	0.36	24042	0.08	632412	2.06	91.8	91.98
159	37973912	5696086800	37069798	97.62	5560469700	134012	0.35	30112	0.08	739990	1.95	91.93	92.11
160	31267944	4690191600	30501434	97.55	4575215100	97320	0.31	28402	0.09	640788	2.05	91.81	91.97
161	30351442	4552716300	29609006	97.55	4441350900	100760	0.33	27870	0.1	613806	2.02	91.88	92.05
162	32809038	4921355700	31956760	97.4	4793514000	95664	0.29	34214	0.11	722400	2.2	92.31	92.48
164	30022074	4503311100	29240802	97.4	4386120300	102618	0.34	21552	0.08	657102	2.19	91.81	91.98
165	29794320	4469148000	28960066	97.2	4344009900	115934	0.39	24858	0.09	693462	2.33	92.28	92.47
166	39854356	5978153400	38892776	97.59	5833916400	126524	0.32	38014	0.1	797042	2	91.79	91.97
167	120915776	18137366400	117419730	97.11	17612959500	427996	0.35	123570	0.11	2944480	2.44	91.49	91.67
SZQ-ZTZ	103478678	15521801700	100874484	97.48	15131172600	345968	0.33	90148	0.09	2168078	2.1	91.95	92.12

## Sheet: Table S3
Table S3 The information of genetic linkage map
Linkage group	Marker_name	Genetic_distance	Physical_distance
A01	A01_362046	0	362046
A01	A01_434444	5.40897	434444
A01	A01_734253	8.53804	734253
A01	A01_1118349	13.3963	1118349
A01	A01_1118293	13.8612	1118293
A01	A01_1199354	15.2347	1199354
A01	A01_990507	16.6135	990507
A01	A01_1041608	17.3189	1041608
A01	A01_988217	18.7116	988217
A01	A01_989993	19.4781	989993
A01	A01_1050175	21.9366	1050175
A01	A01_1114015	24.2052	1114015
A01	A01_1872968	35.2039	1872968
A01	A01_1983728	39.6277	1983728
A01	A01_1983439	40.3839	1983439
A01	A01_2683010	48.6668	2683010
A01	A01_2684394	50.2386	2684394
A01	A01_2686631	50.944	2686631
A01	A01_2649379	51.6698	2649379
A01	A01_3157346	58.0667	3157346
A01	A01_3332694	60.8649	3332694
A01	A01_4102914	67.582	4102914
A01	A01_4565297	71.541	4565297
A01	A01_4347455	75.3318	4347455
A01	A01_6475761	85.6523	6475761
A01	A01_6586837	86.4074	6586837
A01	A01_6420717	87.1425	6420717
A01	A01_6397544	87.7722	6397544
A01	A01_6344213	88.122	6344213
A01	A01_6351176	88.4717	6351176
A01	A01_6344139	88.8337	6344139
A01	A01_8914215	99.0107	8914215
A01	A01_9527261	103.91	9527261
A01	A01_9527254	105.028	9527254
A01	A01_10069223	106.165	10069223
A01	A01_10957130	108.302	10957130
A01	A01_11466303	110.816	11466303
A01	A01_11733033	112.248	11733033
A01	A01_11735656	112.952	11735656
A01	A01_12764835	113.943	12764835
A01	A01_12801966	114.934	12801966
A01	A01_12164395	116.363	12164395
A01	A01_12164403	116.712	12164403
A01	A01_11641906	117.776	11641906
A01	A01_11675914	119.872	11675914
A01	A01_11662569	122.231	11662569
A01	A01_11675555	124.065	11675555
A01	A01_12164370	125.775	12164370
A01	A01_17275644	126.125	17275644
A01	A01_25394555	126.829	25394555
A01	A01_25897211	127.022	25897211
A01	A01_24250295	128.103	24250295
A01	A01_27485538	128.635	27485538
A01	A01_25536942	129.339	25536942
A01	A01_25409119	130.284	25409119
A01	A01_25897616	130.751	25897616
A01	A01_27687886	131.456	27687886
A01	A01_28071561	133.256	28071561
A01	A01_27792969	134.468	27792969
A01	A01_27793147	134.61	27793147
A01	A01_27794134	135.204	27794134
A01	A01_27794991	135.676	27794991
A01	A01_27936068	136.148	27936068
A01	A01_27979486	136.346	27979486
A01	A01_27932086	136.794	27932086
A01	A01_27991771	137.742	27991771
A01	A01_28431036	140.075	28431036
A01	A01_30296803	149.859	30296803
A01	A01_30881834	155.001	30881834
A01	A01_31399381	159.043	31399381
A01	A01_31402786	159.626	31402786
A01	A01_31733592	161.972	31733592
A01	A01_31747683	162.626	31747683
A01	A01_31898930	164.748	31898930
A01	A01_31824099	165.908	31824099
A01	A01_31949651	166.705	31949651
A01	A01_31794323	167.38	31794323
A01	A01_32162112	169.018	32162112
A01	A01_32418525	173.276	32418525
A01	A01_32418617	173.588	32418617
A01	A01_32538139	175.659	32538139
A01	A01_32539308	176.464	32539308
A01	A01_32595346	176.814	32595346
A01	A01_32595351	177.462	32595351
A01	A01_32543056	177.582	32543056
A01	A01_32541376	177.988	32541376
A01	A01_32612724	180.889	32612724
A01	A01_32609233	181.849	32609233
A01	A01_32632201	182.838	32632201
A01	A01_32907368	185.545	32907368
A01	A01_32897830	188.15	32897830
A01	A01_32893194	189.565	32893194
A01	A01_32902499	189.915	32902499
A01	A01_32893731	190.619	32893731
A01	A01_32940067	190.969	32940067
A01	A01_32999892	191.318	32999892
A01	A01_33014800	191.668	33014800
A01	A01_32925047	192.018	32925047
A01	A01_32913933	192.367	32913933
A01	A01_32981155	192.717	32981155
A01	A01_32938043	193.067	32938043
A01	A01_32907668	193.771	32907668
A01	A01_33124601	194.475	33124601
A01	A01_33125122	195.18	33125122
A01	A01_33093260	195.53	33093260
A01	A01_33135081	195.879	33135081
A01	A01_32649339	200.718	32649339
A01	A01_32911224	202.603	32911224
A01	A01_32911193	203.308	32911193
A01	A01_32900600	203.552	32900600
A01	A01_33033666	204.339	33033666
A01	A01_33547503	205.941	33547503
A01	A01_33590781	206.291	33590781
A01	A01_33513587	206.61	33513587
A01	A01_33301320	214.69	33301320
A01	A01_33375704	217.123	33375704
A01	A01_33306739	217.369	33306739
A01	A01_33306446	217.719	33306446
A01	A01_33364511	218.068	33364511
A01	A01_33376811	218.418	33376811
A01	A01_33213320	219.122	33213320
A01	A01_33213357	219.472	33213357
A01	A01_33477582	219.822	33477582
A01	A01_33477642	220.16	33477642
A01	A01_33253232	220.853	33253232
A01	A01_33280703	221.202	33280703
A01	A01_33247403	221.552	33247403
A01	A01_33241764	221.902	33241764
A01	A01_33376697	222.251	33376697
A01	A01_33377056	222.829	33377056
A01	A01_33503602	224.357	33503602
A01	A01_33513732	225.561	33513732
A01	A01_33514265	225.911	33514265
A01	A01_33576777	226.109	33576777
A01	A01_33596532	226.649	33596532
A01	A01_33593282	227.173	33593282
A01	A01_33594271	227.522	33594271
A01	A01_33513875	227.959	33513875
A01	A01_33600444	229.298	33600444
A01	A01_33602028	231.473	33602028
A01	A01_33690765	231.823	33690765
A01	A01_33686772	232.173	33686772
A01	A01_33869614	233.127	33869614
A01	A01_33863673	234.072	33863673
A01	A01_33706868	234.422	33706868
A01	A01_33726768	234.949	33726768
A01	A01_33724138	235.475	33724138
A01	A01_33882730	235.825	33882730
A01	A01_33882191	236.174	33882191
A01	A01_33849624	237.278	33849624
A01	A01_33834554	237.487	33834554
A01	A01_33884090	237.926	33884090
A01	A01_33889318	238.398	33889318
A01	A01_33887203	238.87	33887203
A01	A01_33890097	239.464	33890097
A01	A01_34001075	240.169	34001075
A01	A01_33998680	240.818	33998680
A01	A01_33971747	241.669	33971747
A01	A01_34031584	242.937	34031584
A01	A01_34025244	244.047	34025244
A01	A01_34253142	246.548	34253142
A01	A01_34109833	249.573	34109833
A01	A01_36528510	272.306	36528510
A01	A01_36528535	273.065	36528535
A01	A01_36845775	277.571	36845775
A01	A01_36739184	281.134	36739184
A01	A01_36876585	284.42	36876585
A01	A01_37327546	289.185	37327546
A01	A01_37356914	290.209	37356914
A01	A01_37356908	292.377	37356908
A02	A02_29889657	0	29889657
A02	A02_29889671	0.352017	29889671
A02	A02_30000550	1.65933	30000550
A02	A02_29999711	2.31003	29999711
A02	A02_30020666	2.92208	30020666
A02	A02_29753980	4.49552	29753980
A02	A02_29763397	5.54468	29763397
A02	A02_29753893	5.655	29753893
A02	A02_29857951	6.00505	29857951
A02	A02_29643389	6.7099	29643389
A02	A02_29653954	7.0021	29653954
A02	A02_29606121	7.82122	29606121
A02	A02_29532382	9.71253	29532382
A02	A02_29550677	11.3667	29550677
A02	A02_29261525	13.7409	29261525
A02	A02_29277262	15.2369	29277262
A02	A02_29245961	15.419	29245961
A02	A02_29264884	15.7157	29264884
A02	A02_28842895	16.7825	28842895
A02	A02_29443167	17.8171	29443167
A02	A02_29217405	20.3895	29217405
A02	A02_28644240	21.2316	28644240
A02	A02_28295629	24.038	28295629
A02	A02_28229794	24.6768	28229794
A02	A02_27972985	26.9394	27972985
A02	A02_28117007	27.6747	28117007
A02	A02_27844954	30.5598	27844954
A02	A02_27252470	31.3007	27252470
A02	A02_27281775	31.7317	27281775
A02	A02_27283741	32.4705	27283741
A02	A02_27255447	33.1742	27255447
A02	A02_27121350	34.054	27121350
A02	A02_26874731	35.9198	26874731
A02	A02_27127583	37.6512	27127583
A02	A02_26723741	39.0136	26723741
A02	A02_26663983	39.5407	26663983
A02	A02_26584813	39.9124	26584813
A02	A02_26106879	41.5494	26106879
A02	A02_26154182	41.6979	26154182
A02	A02_26152353	42.3866	26152353
A02	A02_26146538	42.5791	26146538
A02	A02_25810219	43.5749	25810219
A02	A02_25724738	44.6014	25724738
A02	A02_25815004	45.6279	25815004
A02	A02_25845563	46.2961	25845563
A02	A02_25817831	46.6458	25817831
A02	A02_25816996	46.9956	25816996
A02	A02_25848644	47.3453	25848644
A02	A02_25533672	50.8994	25533672
A02	A02_25537451	51.2687	25537451
A02	A02_25535964	51.6381	25535964
A02	A02_25150246	53.9179	25150246
A02	A02_24917180	55.2885	24917180
A02	A02_24585719	57.0567	24585719
A02	A02_24585481	57.4068	24585481
A02	A02_24052877	58.5897	24052877
A02	A02_16568064	60.0318	16568064
A02	A02_16872487	60.3027	16872487
A02	A02_16991584	61.6721	16991584
A02	A02_16590308	63.1016	16590308
A02	A02_18468102	63.4513	18468102
A02	A02_16439324	64.1556	16439324
A02	A02_19408511	64.5054	19408511
A02	A02_24106076	65.2843	24106076
A02	A02_23473223	66.0637	23473223
A02	A02_23550727	66.4141	23550727
A02	A02_23550700	66.7643	23550700
A02	A02_17755973	67.2586	17755973
A02	A02_17573254	67.982	17573254
A02	A02_17589996	68.4322	17589996
A02	A02_17571000	69.0446	17571000
A02	A02_17576988	69.624	17576988
A02	A02_17563776	69.9374	17563776
A02	A02_18356223	70.8223	18356223
A02	A02_15683503	72.1606	15683503
A02	A02_16160639	73.4989	16160639
A02	A02_15571357	74.2807	15571357
A02	A02_15572590	74.6307	15572590
A02	A02_15571325	75.542	15571325
A02	A02_15555682	76.5626	15555682
A02	A02_15569632	76.8004	15569632
A02	A02_15808014	77.1501	15808014
A02	A02_15689041	77.4998	15689041
A02	A02_16161133	77.8494	16161133
A02	A02_16050465	78.1991	16050465
A02	A02_15699002	78.9033	15699002
A02	A02_15704699	79.253	15704699
A02	A02_15722520	79.9573	15722520
A02	A02_15698952	80.6615	15698952
A02	A02_16027466	80.9719	16027466
A02	A02_14379496	84.2057	14379496
A02	A02_14180829	86.7469	14180829
A02	A02_14019548	90.2568	14019548
A02	A02_12437096	93.7718	12437096
A02	A02_12971484	94.817	12971484
A02	A02_12436301	95.5581	12436301
A02	A02_13020084	98.5087	13020084
A02	A02_11597049	103.722	11597049
A02	A02_10929431	106.63	10929431
A02	A02_10920334	107.573	10920334
A02	A02_10945656	108.176	10945656
A02	A02_10945639	109.605	10945639
A02	A02_10844344	110.029	10844344
A02	A02_9766788	113.622	9766788
A02	A02_9501126	114.306	9501126
A02	A02_9231543	116	9231543
A02	A02_9231502	116.351	9231502
A02	A02_8897155	120.099	8897155
A02	A02_8830032	121.168	8830032
A02	A02_8830505	121.442	8830505
A02	A02_9053283	123.055	9053283
A02	A02_9053865	123.596	9053865
A02	A02_9050576	123.999	9050576
A02	A02_8915939	125.852	8915939
A02	A02_8355546	128.461	8355546
A02	A02_8534716	129.74	8534716
A02	A02_7970492	132.31	7970492
A02	A02_7794034	133.467	7794034
A02	A02_7818694	133.901	7818694
A02	A02_7460584	134.885	7460584
A02	A02_7420414	135.292	7420414
A02	A02_6661404	139.749	6661404
A02	A02_6657458	140.355	6657458
A02	A02_6653673	141.355	6653673
A02	A02_5994101	146.157	5994101
A02	A02_5888511	146.943	5888511
A02	A02_5634515	152.309	5634515
A02	A02_5521859	153.883	5521859
A02	A02_5330417	156.835	5330417
A02	A02_4841742	164.395	4841742
A02	A02_4846498	165.099	4846498
A02	A02_4864804	165.536	4864804
A02	A02_4861112	166.421	4861112
A02	A02_4854110	166.858	4854110
A02	A02_4870689	167.208	4870689
A02	A02_4870853	167.208	4870853
A02	A02_4661846	168.586	4661846
A02	A02_4739766	169.663	4739766
A02	A02_4739982	170.233	4739982
A02	A02_4740328	170.655	4740328
A02	A02_4742326	171.539	4742326
A02	A02_4739782	171.977	4739782
A02	A02_4744512	172.414	4744512
A02	A02_4742672	172.764	4742672
A02	A02_4578862	175.28	4578862
A02	A02_4537977	175.829	4537977
A02	A02_4626317	176.808	4626317
A02	A02_3643695	185.755	3643695
A02	A02_3643508	186.516	3643508
A02	A02_3616573	187.476	3616573
A02	A02_3638885	188.103	3638885
A02	A02_2405267	196.694	2405267
A02	A02_1127737	206.815	1127737
A02	A02_1193721	207.708	1193721
A02	A02_1198282	208.427	1198282
A02	A02_1190669	208.92	1190669
A02	A02_1200840	209.27	1200840
A02	A02_1200241	209.619	1200241
A02	A02_1125609	210.671	1125609
A02	A02_787926	216.893	787926
A02	A02_787855	218.207	787855
A02	A02_679328	220.943	679328
A02	A02_138899	224.756	138899
A02	A02_336794	227.23	336794
A03	A03_31380097	0	31380097
A03	A03_33144585	15.4302	33144585
A03	A03_32143391	18.3022	32143391
A03	A03_33413431	21.7429	33413431
A03	A03_30266087	24.4779	30266087
A03	A03_29463837	26.4199	29463837
A03	A03_28977606	28.9742	28977606
A03	A03_28309949	30.9917	28309949
A03	A03_28571158	32.6753	28571158
A03	A03_28721943	37.3823	28721943
A03	A03_28978570	47.3023	28978570
A03	A03_25315734	58.0229	25315734
A03	A03_25315769	58.3927	25315769
A03	A03_24091031	65.8764	24091031
A03	A03_24564019	69.7536	24564019
A03	A03_24529868	71.6314	24529868
A03	A03_24529829	72.0176	24529829
A03	A03_22255484	87.0482	22255484
A03	A03_21893842	90.0409	21893842
A03	A03_21884057	90.7461	21884057
A03	A03_21884083	92.2672	21884083
A03	A03_21746629	95.8633	21746629
A03	A03_21464240	96.9764	21464240
A03	A03_21402648	98.3018	21402648
A03	A03_21427677	98.714	21427677
A03	A03_21258882	100.953	21258882
A03	A03_21244755	101.949	21244755
A03	A03_20656165	104.635	20656165
A03	A03_20191311	109.973	20191311
A03	A03_19327317	117.081	19327317
A03	A03_18626256	120.913	18626256
A03	A03_18674664	122.297	18674664
A03	A03_18678321	123.001	18678321
A03	A03_18675863	124.065	18675863
A03	A03_18642635	124.364	18642635
A03	A03_19021286	126.965	19021286
A03	A03_18989849	128.624	18989849
A03	A03_18552224	130.795	18552224
A03	A03_18478680	131.301	18478680
A03	A03_18154322	133.176	18154322
A03	A03_18114992	133.525	18114992
A03	A03_18123942	133.875	18123942
A03	A03_18233115	134.897	18233115
A03	A03_17998461	136.735	17998461
A03	A03_17998445	136.735	17998445
A03	A03_17998115	137.63	17998115
A03	A03_18064831	139.012	18064831
A03	A03_18064813	139.339	18064813
A03	A03_17889905	140.947	17889905
A03	A03_17890108	141.395	17890108
A03	A03_17675104	142.989	17675104
A03	A03_17720809	146.783	17720809
A03	A03_17348987	148.411	17348987
A03	A03_17352573	149.428	17352573
A03	A03_17541753	150.467	17541753
A03	A03_17502329	150.875	17502329
A03	A03_17502322	151.198	17502322
A03	A03_16438506	155.98	16438506
A03	A03_16420803	156.683	16420803
A03	A03_16103917	159.62	16103917
A03	A03_16103942	160.222	16103942
A03	A03_16149001	162.649	16149001
A03	A03_16377389	163.435	16377389
A03	A03_16382381	164.508	16382381
A03	A03_16382410	164.713	16382410
A03	A03_16383233	165.153	16383233
A03	A03_16380272	165.502	16380272
A03	A03_16562839	166.717	16562839
A03	A03_16380318	167.196	16380318
A03	A03_16657704	167.297	16657704
A03	A03_16590064	167.763	16590064
A03	A03_16694381	168.963	16694381
A03	A03_16403687	170.138	16403687
A03	A03_16403789	170.814	16403789
A03	A03_16330987	171.489	16330987
A03	A03_15921764	171.888	15921764
A03	A03_15921733	172.064	15921733
A03	A03_15871263	173.129	15871263
A03	A03_15869328	173.479	15869328
A03	A03_15764534	176.344	15764534
A03	A03_15708061	177.774	15708061
A03	A03_15618144	178.976	15618144
A03	A03_15712008	179.228	15712008
A03	A03_15601535	179.578	15601535
A03	A03_15552250	180.042	15552250
A03	A03_15560950	181.011	15560950
A03	A03_15614770	181.703	15614770
A03	A03_15643838	181.901	15643838
A03	A03_15560981	182.251	15560981
A03	A03_15502132	182.667	15502132
A03	A03_15502083	182.92	15502083
A03	A03_15505342	184.464	15505342
A03	A03_15456926	185.475	15456926
A03	A03_15311627	186.85	15311627
A03	A03_15313829	187.805	15313829
A03	A03_15266181	188.401	15266181
A03	A03_15310090	188.956	15310090
A03	A03_15135409	191.09	15135409
A03	A03_14405166	197.751	14405166
A03	A03_14405171	198.21	14405171
A03	A03_16048755	223.369	16048755
A03	A03_16014116	249.128	16014116
A03	A03_19451005	283.748	19451005
A04	A04_4221964	0	4221964
A04	A04_4676839	10.6246	4676839
A04	A04_4135569	13.2285	4135569
A04	A04_4052077	15.3332	4052077
A04	A04_13960200	24.9358	13960200
A04	A04_13953554	25.2854	13953554
A04	A04_13976958	25.6351	13976958
A04	A04_13990448	26.0725	13990448
A04	A04_13961421	26.51	13961421
A04	A04_13954937	27.3957	13954937
A04	A04_13938341	28.101	13938341
A04	A04_13934174	28.4546	13934174
A04	A04_15382917	34.6715	15382917
A04	A04_16958143	42.8013	16958143
A04	A04_16970284	43.2998	16970284
A04	A04_16968895	43.8268	16968895
A04	A04_17089767	46.4154	17089767
A04	A04_17089773	46.7727	17089773
A04	A04_19630018	64.1301	19630018
A04	A04_20313721	70.2859	20313721
A04	A04_20420171	72.9044	20420171
A04	A04_20421134	73.3203	20421134
A04	A04_21857146	80.0438	21857146
A04	A04_21874800	81.7628	21874800
A04	A04_21872272	82.1817	21872272
A04	A04_21872279	82.3164	21872279
A04	A04_21743854	82.7125	21743854
A04	A04_21816043	83.1086	21816043
A04	A04_21747412	84.2948	21747412
A04	A04_21688952	84.8235	21688952
A04	A04_21278898	86.2255	21278898
A04	A04_21258239	88.2307	21258239
A04	A04_21748937	89.4318	21748937
A04	A04_21860409	89.7816	21860409
A04	A04_22189929	93.928	22189929
A04	A04_22189919	94.2783	22189919
A04	A04_22564807	96.3928	22564807
A04	A04_22564813	96.7994	22564813
A04	A04_22577662	98.4943	22577662
A04	A04_22606105	99.4855	22606105
A04	A04_22729283	101.286	22729283
A04	A04_22836773	102.674	22836773
A04	A04_22890516	103.31	22890516
A04	A04_22877732	104.113	22877732
A04	A04_22985866	106.492	22985866
A04	A04_23289784	107.616	23289784
A04	A04_23274989	109.034	23274989
A04	A04_23274878	110.667	23274878
A04	A04_23489618	115.863	23489618
A04	A04_23569387	117.281	23569387
A04	A04_22875875	130.046	22875875
A05	A05_4156545	0	4156545
A05	A05_3653099	20.0032	3653099
A05	A05_3767667	22.3741	3767667
A05	A05_3794278	23.2296	3794278
A05	A05_3910225	24.3717	3910225
A05	A05_4011127	25.821	4011127
A05	A05_3832045	26.938	3832045
A05	A05_4231556	28.8679	4231556
A05	A05_4493740	31.0245	4493740
A05	A05_4669021	32.0912	4669021
A05	A05_4694415	33.4328	4694415
A05	A05_4691883	33.869	4691883
A05	A05_5016508	36.6684	5016508
A05	A05_5345805	38.1805	5345805
A05	A05_5120627	39.4422	5120627
A05	A05_5120468	40.4034	5120468
A05	A05_5432491	41.4882	5432491
A05	A05_5569368	44.6533	5569368
A05	A05_5263242	47.3477	5263242
A05	A05_5233335	47.7848	5233335
A05	A05_5233425	48.404	5233425
A05	A05_5234275	49.6892	5234275
A05	A05_4832923	51.98	4832923
A05	A05_6232084	63.1841	6232084
A05	A05_6260365	65.7107	6260365
A05	A05_7707415	72.7213	7707415
A05	A05_7704457	75.0007	7704457
A05	A05_8120804	76.7565	8120804
A05	A05_8462342	78.7759	8462342
A05	A05_8478186	79.5307	8478186
A05	A05_8800020	81.9368	8800020
A05	A05_9891709	83.5104	9891709
A05	A05_9806510	83.8608	9806510
A05	A05_9806583	84.2108	9806583
A05	A05_9706465	84.5615	9706465
A05	A05_10856318	86.3629	10856318
A05	A05_10901103	86.9604	10901103
A05	A05_11171208	87.916	11171208
A05	A05_11204381	88.3124	11204381
A05	A05_11771938	90.9044	11771938
A05	A05_12874675	92.549	12874675
A05	A05_29093151	93.1855	29093151
A05	A05_27115933	94.2077	27115933
A05	A05_21303499	96.8126	21303499
A05	A05_29063130	99.4534	29063130
A05	A05_13741883	101.311	13741883
A05	A05_12152574	102.467	12152574
A05	A05_13651117	102.715	13651117
A05	A05_13563014	103.152	13563014
A05	A05_13610005	103.59	13610005
A05	A05_14131420	104.476	14131420
A05	A05_27741503	104.826	27741503
A05	A05_14279646	105.176	14279646
A05	A05_14351481	105.402	14351481
A05	A05_31281843	107.446	31281843
A05	A05_31281838	107.796	31281838
A05	A05_30786287	108.097	30786287
A05	A05_31910986	110.698	31910986
A05	A05_31884658	113.199	31884658
A05	A05_31884654	113.486	31884654
A05	A05_32028357	114.392	32028357
A05	A05_32085223	114.791	32085223
A05	A05_32080479	114.948	32080479
A05	A05_31984114	115.188	31984114
A05	A05_31990072	115.427	31990072
A05	A05_31990046	115.777	31990046
A05	A05_31991244	116.127	31991244
A05	A05_32557257	117.697	32557257
A05	A05_32557284	118.032	32557284
A05	A05_32557122	120.218	32557122
A05	A05_32346644	124.265	32346644
A05	A05_32309404	125.29	32309404
A05	A05_32596400	126.355	32596400
A05	A05_33424030	127.421	33424030
A05	A05_33511962	128.614	33511962
A05	A05_33590483	129.875	33590483
A05	A05_42602805	131.889	42602805
A05	A05_34236192	133.103	34236192
A05	A05_42661515	134.563	42661515
A05	A05_35697204	143.966	35697204
A05	A05_35086273	145.432	35086273
A05	A05_35310454	146.09	35310454
A05	A05_35117532	146.491	35117532
A05	A05_35931973	148.557	35931973
A05	A05_36319917	151.108	36319917
A05	A05_36411446	152.32	36411446
A05	A05_36678960	154.058	36678960
A05	A05_37165940	158.613	37165940
A05	A05_37269546	161.082	37269546
A05	A05_37597384	166.287	37597384
A05	A05_37908512	172.108	37908512
A05	A05_38444088	179.014	38444088
A05	A05_38443991	179.784	38443991
A05	A05_38662731	186.382	38662731
A05	A05_38558656	189.785	38558656
A05	A05_39143670	198.776	39143670
A05	A05_39143664	199.552	39143664
A05	A05_40442857	211.113	40442857
A05	A05_40454405	212.371	40454405
A05	A05_40922533	219.188	40922533
A05	A05_41334988	220.389	41334988
A05	A05_40945072	220.529	40945072
A05	A05_40938797	220.769	40938797
A05	A05_41172883	221.009	41172883
A05	A05_40964982	221.893	40964982
A05	A05_41407917	222.778	41407917
A05	A05_41880065	226.397	41880065
A05	A05_41880002	227.936	41880002
A06	A06_472156	0	472156
A06	A06_472181	5e-08	472181
A06	A06_1498549	6.92571	1498549
A06	A06_1498523	7.24318	1498523
A06	A06_1498547	7.59681	1498547
A06	A06_1639564	8.36849	1498549
A06	A06_1715288	12.2829	1715288
A06	A06_1918651	14.5897	1918651
A06	A06_1923264	15.6556	1923264
A06	A06_2318231	16.0058	2318231
A06	A06_1826019	16.8394	1826019
A06	A06_1993302	17.1897	1993302
A06	A06_2207550	18.2204	2207550
A06	A06_2207595	18.6514	2207595
A06	A06_2277812	19.082	2277812
A06	A06_2304049	19.6291	2304049
A06	A06_2232405	19.9629	2232405
A06	A06_1883187	21.242	1883187
A06	A06_1888389	21.6831	1888389
A06	A06_2852209	26.0751	2852209
A06	A06_2915200	28.7798	2915200
A06	A06_2963013	30.194	2963013
A06	A06_3084161	31.6318	3084161
A06	A06_3084185	32.0995	3084185
A06	A06_3226127	35.0278	3226127
A06	A06_3510299	39.3829	3510299
A06	A06_3484345	39.7612	3484345
A06	A06_3486547	40.4667	3486547
A06	A06_3531148	41.7913	3531148
A06	A06_3458700	43.4849	3458700
A06	A06_3459756	46.0466	3459756
A06	A06_3480511	46.7536	3480511
A06	A06_3480524	46.7536	3480524
A06	A06_3522394	47.8591	3522394
A06	A06_4017254	55.2141	4017254
A06	A06_4346430	57.8205	4346430
A06	A06_4455476	60.1609	4455476
A06	A06_4898230	65.0364	4898230
A06	A06_4911269	66.458	4911269
A06	A06_4906531	67.8066	4906531
A06	A06_4923964	69.7975	4923964
A06	A06_5204322	71.7839	5204322
A06	A06_5170208	72.1623	5170208
A06	A06_5470463	74.1071	5470463
A06	A06_6179638	76.4412	6179638
A06	A06_6187062	77.9151	6187062
A06	A06_6855526	84.5915	6855526
A06	A06_7101028	88.1244	7101028
A06	A06_7426522	89.3609	7426522
A06	A06_7426515	89.7104	7426515
A06	A06_7479732	90.4151	7479732
A06	A06_7523622	90.7649	7523622
A06	A06_7567290	92.708	7567290
A06	A06_7633342	95.4822	7633342
A06	A06_7633356	95.8323	7633356
A06	A06_7633744	96.1826	7633744
A06	A06_7690564	96.5323	7690564
A06	A06_7917804	97.2366	7917804
A06	A06_8090584	97.5863	8090584
A06	A06_8031711	97.936	8031711
A06	A06_8020483	98.2858	8020483
A06	A06_8140373	98.9901	8140373
A06	A06_8289809	99.3399	8289809
A06	A06_8191127	99.6896	8191127
A06	A06_8177451	100.11	8177451
A06	A06_8182175	101.79	8182175
A06	A06_8190090	102.086	8190090
A06	A06_8191037	102.726	8191037
A06	A06_8448735	102.871	8448735
A06	A06_8810969	103.387	8810969
A06	A06_8874501	104.342	8874501
A06	A06_8912088	104.937	8912088
A06	A06_8822540	105.717	8822540
A06	A06_8814650	106.496	8814650
A06	A06_8864512	107.602	8864512
A06	A06_8853356	108.257	8853356
A06	A06_9032807	108.607	9032807
A06	A06_8934018	109.188	8934018
A06	A06_8968531	109.875	8968531
A06	A06_9047008	109.978	9047008
A06	A06_9040512	110.328	9040512
A06	A06_9169544	111.652	9169544
A06	A06_9169950	112.698	9169950
A06	A06_9116842	113.086	9116842
A06	A06_9161967	113.523	9161967
A06	A06_9114145	113.959	9114145
A06	A06_9122331	114.271	9122331
A06	A06_9604964	115.492	9604964
A06	A06_10591527	116.299	10591527
A06	A06_10250895	116.825	10250895
A06	A06_10262322	117.351	10262322
A06	A06_10295004	117.947	10295004
A06	A06_10302019	118.419	10302019
A06	A06_10591739	118.892	10591739
A06	A06_10592437	119.241	10592437
A06	A06_10974043	119.591	10974043
A06	A06_11006693	120.295	11006693
A06	A06_9790357	120.986	9790357
A06	A06_9799578	121.187	9799578
A06	A06_10664561	121.541	10664561
A06	A06_10626525	122.102	10626525
A06	A06_9813937	122.724	9813937
A06	A06_10955892	123.414	10955892
A06	A06_10675615	124.322	10675615
A06	A06_11003043	125.026	11003043
A06	A06_10892403	125.731	10892403
A06	A06_10884809	126.08	10884809
A06	A06_10022641	127.037	10022641
A06	A06_10615367	127.994	10615367
A06	A06_10250157	128.639	10250157
A06	A06_9407248	129.898	9407248
A06	A06_9487689	130.995	9487689
A06	A06_9487690	131.433	9487690
A06	A06_9547986	132.568	9547986
A06	A06_10302011	134.979	10302011
A06	A06_11110343	136.565	11110343
A06	A06_10692594	136.837	10692594
A06	A06_11009872	137.187	11009872
A06	A06_11111722	137.694	11111722
A06	A06_11434973	138.265	11434973
A06	A06_11009903	138.327	11009903
A06	A06_10652103	139.11	10652103
A06	A06_11733166	140.192	11733166
A06	A06_11726289	140.833	11726289
A06	A06_11728994	141.319	11728994
A06	A06_11725112	141.669	11725112
A06	A06_11635015	142.018	11635015
A06	A06_11674727	142.368	11674727
A06	A06_12533887	142.79	12533887
A06	A06_12581354	143.213	12581354
A06	A06_24304929	143.864	24304929
A06	A06_15321224	144.305	15321224
A06	A06_15818429	144.655	15818429
A06	A06_19941269	145.005	19941269
A06	A06_14670144	145.355	14670144
A06	A06_15140031	145.705	15140031
A06	A06_16263190	146.316	16263190
A06	A06_15178944	146.721	15178944
A06	A06_14576991	147.333	14576991
A06	A06_24419563	147.613	24419563
A06	A06_27596849	147.985	27596849
A06	A06_15778458	148.356	15778458
A06	A06_16299032	149.135	16299032
A06	A06_14623834	150.24	14623834
A06	A06_15180096	150.486	15180096
A06	A06_19926271	151.027	19926271
A06	A06_14411525	151.568	14411525
A06	A06_16661646	151.917	16661646
A06	A06_24807619	152.267	24807619
A06	A06_14576942	152.807	14576942
A06	A06_21788533	153.348	21788533
A06	A06_19937957	153.882	19937957
A06	A06_25793483	154.415	25793483
A06	A06_27416062	154.855	27416062
A06	A06_21759387	155.307	21759387
A06	A06_14395637	155.616	14395637
A06	A06_15967789	156.503	15967789
A06	A06_27455325	157.473	27455325
A06	A06_13454469	159.022	13454469
A06	A06_19879959	159.57	19879959
A06	A06_16004897	160.009	16004897
A06	A06_27613290	160.528	27613290
A06	A06_15148664	161.005	15148664
A06	A06_15024303	162.16	15024303
A06	A06_21226637	162.582	21226637
A06	A06_16018489	162.582	16018489
A06	A06_21767842	162.931	21767842
A06	A06_27609060	163.281	27609060
A06	A06_16018514	163.281	16018514
A06	A06_21744285	163.281	21744285
A06	A06_24512329	163.497	24512329
A06	A06_21789215	164.266	21789215
A06	A06_15637337	164.266	15637337
A06	A06_15992979	164.266	15992979
A06	A06_23912374	164.616	23912374
A06	A06_24807216	165.985	24807216
A06	A06_15328760	167.883	15328760
A06	A06_23275346	169.01	23275346
A06	A06_16022091	169.01	16022091
A06	A06_25489106	169.01	25489106
A06	A06_20198816	169.36	20198816
A06	A06_14866015	169.599	14866015
A06	A06_14560582	169.839	14560582
A06	A06_25836645	171.873	25836645
A06	A06_28536779	174.17	28536779
A06	A06_27969681	176.524	27969681
A06	A06_28522618	176.953	28522618
A06	A06_28505961	177.302	28505961
A06	A06_28489223	177.652	28489223
A06	A06_23912351	178.229	23912351
A06	A06_27924800	178.805	27924800
A06	A06_27957294	178.805	27957294
A06	A06_27974267	179.155	27974267
A06	A06_28063541	179.155	28063541
A06	A06_28419063	179.155	28419063
A06	A06_28486227	179.505	28486227
A06	A06_29830222	179.505	29830222
A06	A06_27946362	179.855	27946362
A06	A06_28176474	179.855	28176474
A06	A06_28420934	180.204	28420934
A06	A06_28511777	180.204	28511777
A06	A06_27948223	180.554	27948223
A06	A06_29867784	180.554	29867784
A06	A06_27950941	181.387	27950941
A06	A06_27951053	181.387	27951053
A06	A06_27951065	181.387	27951065
A06	A06_30358986	182.221	30358986
A06	A06_30398303	182.869	30398303
A06	A06_31187251	183.374	31187251
A06	A06_31305319	183.723	31305319
A06	A06_31325247	183.723	31325247
A06	A06_31329443	183.723	31329443
A06	A06_31419851	184.073	31419851
A06	A06_31416951	184.073	31416951
A06	A06_31438575	184.073	31438575
A06	A06_31391512	184.423	31391512
A06	A06_31420132	184.423	31420132
A06	A06_31368314	184.772	31368314
A06	A06_31415066	184.772	31415066
A06	A06_31440532	185.539	31440532
A06	A06_31303310	186.451	31303310
A06	A06_31169634	186.762	31169634
A06	A06_31304420	186.762	31304420
A06	A06_31170736	187.466	31170736
A06	A06_31199156	187.466	31199156
A06	A06_31324944	187.816	31324944
A06	A06_31291248	187.816	31291248
A06	A06_31155101	187.816	31155101
A06	A06_31704063	188.591	31704063
A06	A06_31758069	188.591	31758069
A06	A06_31647621	189.478	31647621
A06	A06_31657555	190.021	31657555
A06	A06_31776043	190.439	31776043
A06	A06_31980975	191.071	31980975
A06	A06_31968356	191.703	31968356
A06	A06_31982486	191.703	31982486
A06	A06_31982568	192.053	31982568
A06	A06_31982436	192.053	31982436
A06	A06_31990551	193.117	31990551
A06	A06_32009359	193.117	32009359
A06	A06_32009346	193.466	32009346
A06	A06_32009334	193.466	32009334
A06	A06_32373875	196.578	32373875
A06	A06_32366292	198.858	32366292
A06	A06_32330107	199.923	32330107
A06	A06_32381911	199.923	32381911
A06	A06_32366447	200.273	32366447
A06	A06_32373628	200.273	32373628
A06	A06_32374527	200.273	32374527
A06	A06_32387960	200.623	32387960
A06	A06_32443145	201.749	32443145
A06	A06_32413286	202.875	32413286
A06	A06_32413721	202.875	32413721
A06	A06_32437220	203.224	32437220
A06	A06_32534716	203.574	32534716
A06	A06_32534610	203.574	32534610
A06	A06_32457269	203.986	32457269
A06	A06_32988420	205.686	32988420
A06	A06_32961012	205.686	32961012
A06	A06_32971009	206.857	32971009
A06	A06_32559514	206.857	32559514
A06	A06_32972138	206.992	32972138
A06	A06_32559523	206.992	32559523
A06	A06_32971313	206.992	32971313
A06	A06_32551537	207.341	32551537
A06	A06_32988327	207.341	32988327
A06	A06_33042107	208.046	33042107
A06	A06_33068747	208.75	33068747
A06	A06_33072027	208.75	33072027
A06	A06_33116246	209.1	33116246
A06	A06_33045483	210.055	33045483
A06	A06_33045747	210.651	33045747
A06	A06_33045792	211.419	33045792
A06	A06_33116216	212.629	33116216
A06	A06_33113343	212.629	33113343
A06	A06_33065873	213.17	33065873
A06	A06_33175841	213.711	33175841
A06	A06_33175837	214.06	33175837
A06	A06_33303671	214.06	33303671
A06	A06_33297605	214.41	33297605
A06	A06_33297700	214.41	33297700
A06	A06_33278592	214.76	33278592
A06	A06_33278602	214.76	33278602
A06	A06_33575467	215.464	33575467
A06	A06_33607687	215.814	33607687
A06	A06_33609580	216.164	33609580
A06	A06_33610527	216.164	33610527
A06	A06_33610651	216.513	33610651
A06	A06_33647239	216.863	33647239
A06	A06_33651525	217.39	33651525
A06	A06_33666741	217.917	33666741
A06	A06_33651889	217.917	33651889
A06	A06_33713747	218.383	33713747
A06	A06_34278984	219.328	34278984
A06	A06_34274612	219.328	34274612
A06	A06_34893754	220.096	34893754
A06	A06_34893776	220.096	34893776
A06	A06_34729824	220.312	34729824
A06	A06_34915337	220.312	34915337
A06	A06_34708188	220.907	34708188
A06	A06_35227786	221.86	35227786
A06	A06_35214424	221.86	35214424
A06	A06_35203408	222.565	35203408
A06	A06_35181668	222.915	35181668
A06	A06_35082377	223.264	35082377
A06	A06_35085551	223.539	35085551
A06	A06_33832720	225.15	33832720
A06	A06_33803628	225.5	33803628
A06	A06_33885288	226.205	33885288
A06	A06_33760912	226.555	33760912
A06	A06_35204153	227.62	35204153
A06	A06_35204424	227.62	35204424
A06	A06_35197428	227.97	35197428
A06	A06_35206796	228.319	35206796
A06	A06_34864819	229.025	34864819
A06	A06_34706023	230.005	34706023
A06	A06_35190707	230.907	35190707
A06	A06_34765155	232.265	34765155
A06	A06_34807646	232.489	34807646
A06	A06_34765171	232.489	34765171
A06	A06_35171083	232.599	35171083
A06	A06_34766887	233.842	34766887
A06	A06_34971354	235.272	34971354
A06	A06_34864199	235.623	34864199
A06	A06_35201739	235.623	35201739
A06	A06_35414887	236.327	35414887
A06	A06_35236753	236.327	35236753
A06	A06_35234409	236.677	35234409
A06	A06_35238665	236.677	35238665
A06	A06_35242784	236.677	35242784
A06	A06_35446730	237.381	35446730
A06	A06_35449389	237.381	35449389
A06	A06_35501203	238.445	35501203
A06	A06_35517356	238.445	35517356
A06	A06_35578421	239.509	35578421
A06	A06_35575088	239.509	35575088
A06	A06_35597390	239.509	35597390
A06	A06_35634104	242.027	35634104
A06	A06_36000427	243.788	36000427
A06	A06_35993651	244.138	35993651
A06	A06_35998063	244.138	35998063
A06	A06_35919214	244.843	35919214
A06	A06_35887468	245.549	35887468
A06	A06_36235647	247.317	36235647
A06	A06_36262421	248.716	36262421
A06	A06_36084594	249.672	36084594
A06	A06_36099767	250.269	36099767
A06	A06_36125851	250.974	36125851
A06	A06_36102901	250.974	36102901
A06	A06_36102365	251.421	36102365
A06	A06_36138085	251.869	36138085
A06	A06_36131257	252.587	36131257
A06	A06_36148652	253.082	36148652
A06	A06_36341262	254.512	36341262
A06	A06_36334736	254.512	36334736
A06	A06_36336557	254.862	36336557
A06	A06_36340585	254.862	36340585
A06	A06_36343068	254.862	36343068
A06	A06_36331542	255.212	36331542
A06	A06_36331987	255.212	36331987
A06	A06_36333356	255.212	36333356
A06	A06_36339952	255.561	36339952
A06	A06_36341117	255.561	36341117
A06	A06_36345276	255.561	36345276
A06	A06_36510946	257.361	36510946
A06	A06_36462688	257.361	36462688
A06	A06_36504957	257.71	36504957
A06	A06_36512546	257.71	36512546
A06	A06_36518087	258.06	36518087
A06	A06_36519281	258.409	36519281
A06	A06_36476709	259.114	36476709
A06	A06_36503943	259.114	36503943
A06	A06_36554271	259.114	36554271
A06	A06_36555613	259.463	36555613
A06	A06_36619585	259.813	36619585
A06	A06_36705457	259.813	36705457
A06	A06_36498875	259.813	36498875
A06	A06_36720794	260.408	36720794
A06	A06_36475683	261.363	36475683
A06	A06_36476772	261.713	36476772
A06	A06_36498933	262.634	36498933
A06	A06_36583606	263.248	36583606
A06	A06_36610235	263.248	36610235
A06	A06_36612281	264.131	36612281
A06	A06_36642429	264.131	36642429
A06	A06_36642514	264.304	36642514
A06	A06_36699460	264.648	36699460
A06	A06_36704710	264.648	36704710
A06	A06_36641542	264.648	36641542
A06	A06_36698032	265.712	36698032
A06	A06_36700688	265.712	36700688
A06	A06_36704711	265.712	36704711
A06	A06_36871900	266.776	36871900
A06	A06_36881317	266.776	36881317
A06	A06_36859574	267.48	36859574
A06	A06_36862697	267.48	36862697
A06	A06_36836372	267.578	36836372
A06	A06_36863932	267.676	36863932
A06	A06_36859694	267.676	36859694
A06	A06_36959935	267.676	36959935
A06	A06_36986568	268.083	36986568
A06	A06_37024196	268.49	37024196
A06	A06_37112062	268.897	37112062
A06	A06_37102155	268.897	37102155
A06	A06_37096374	269.247	37096374
A06	A06_36988822	269.597	36988822
A06	A06_36991608	269.597	36991608
A06	A06_37015586	269.597	37015586
A06	A06_37101824	270.301	37101824
A06	A06_37096684	270.301	37096684
A06	A06_37012178	271.365	37012178
A06	A06_37016997	271.365	37016997
A06	A06_37101793	272.795	37101793
A06	A06_37113739	273.501	37113739
A06	A06_37120127	274.566	37120127
A06	A06_37122977	274.566	37122977
A06	A06_36996704	275.157	36996704
A06	A06_37124942	276.063	37124942
A06	A06_37125029	276.063	37125029
A06	A06_37385591	278.086	37385591
A06	A06_37215891	278.894	37215891
A06	A06_37229211	278.894	37229211
A06	A06_37365660	279.543	37365660
A06	A06_37224386	281.613	37224386
A06	A06_37224409	281.613	37224409
A06	A06_37663388	285.301	37663388
A06	A06_37657327	285.301	37657327
A06	A06_37657357	286.368	37657357
A06	A06_37994746	287.492	37994746
A06	A06_37993918	287.947	37993918
A06	A06_37966376	288.896	37966376
A06	A06_37966344	288.896	37966344
A06	A06_37994793	290.582	37994793
A06	A06_37994799	290.582	37994799
A06	A06_38369651	294.897	38369651
A06	A06_38369653	294.897	38369653
A06	A06_38820619	299.656	38820619
A06	A06_39464218	302.56	39464218
A06	A06_39799439	305.9	39799439
A06	A06_39698598	306.953	39698598
A06	A06_40133203	308.149	40133203
A06	A06_40141434	308.149	40141434
A06	A06_40141432	308.941	40141432
A06	A06_41234140	313.644	41234140
A06	A06_40667734	316.178	40667734
A06	A06_41289156	317.966	41289156
A06	A06_41457403	321.448	41457403
A06	A06_41942840	327.485	41942840
A06	A06_41866031	328.915	41866031
A06	A06_41968727	330.469	41968727
A06	A06_41962976	330.987	41962976
A06	A06_41968809	330.987	41968809
A06	A06_41968807	331.692	41968807
A06	A06_41969190	332.397	41969190
A06	A06_41959235	333.102	41959235
A06	A06_42046997	334.903	42046997
A06	A06_42046969	334.903	42046969
A06	A06_42089413	335.252	42089413
A06	A06_42180933	335.957	42180933
A06	A06_42173091	336.452	42173091
A06	A06_42188094	337.667	42188094
A06	A06_42194139	337.667	42194139
A06	A06_42194975	337.667	42194975
A06	A06_42199208	338.324	42199208
A06	A06_42199282	338.324	42199282
A06	A06_42190637	338.324	42190637
A06	A06_42290042	340.83	42290042
A06	A06_42294610	340.83	42294610
A06	A06_42294861	340.83	42294861
A06	A06_42305150	341.894	42305150
A06	A06_42313090	341.894	42313090
A06	A06_42287218	342.837	42287218
A06	A06_42328480	343.782	42328480
A06	A06_42426121	344.846	42426121
A06	A06_42413060	345.196	42413060
A06	A06_42411996	345.196	42411996
A06	A06_42411280	345.196	42411280
A06	A06_42416421	345.546	42416421
A06	A06_42416587	345.546	42416587
A06	A06_42412009	345.546	42412009
A06	A06_42391411	345.546	42391411
A06	A06_42391235	345.835	42391235
A06	A06_42641227	348.55	42641227
A06	A06_42641412	348.933	42641412
A06	A06_42618343	349.716	42618343
A07	A07_22979040	0	22979040
A07	A07_23003740	0.395789	23003740
A07	A07_23512192	4.16371	23512192
A07	A07_23482698	4.6055	23482698
A07	A07_23550441	6.5722	23550441
A07	A07_23907906	10.5487	23907906
A07	A07_23942047	11.3127	23942047
A07	A07_24141603	13.8181	24141603
A07	A07_24516901	16.2885	24516901
A07	A07_24792971	17.0474	24792971
A07	A07_24793057	17.0474	24793057
A07	A07_25407879	20.265	25407879
A07	A07_25407903	20.265	25407903
A07	A07_25431510	21.2143	25431510
A07	A07_25577477	24.5236	25577477
A07	A07_25980678	30.3168	25980678
A07	A07_27816644	44.8173	27816644
A07	A07_27707026	46.0347	27707026
A07	A07_27707080	46.0347	27707080
A07	A07_27707100	46.0347	27707100
A07	A07_27707105	46.0347	27707105
A07	A07_27701084	46.809	27701084
A07	A07_27697583	48	27697583
A07	A07_27705628	48	27705628
A07	A07_27679058	49.2181	27679058
A07	A07_27810334	50.0228	27810334
A07	A07_27811998	50.384	27811998
A07	A07_27886305	51.3499	27886305
A07	A07_27886567	51.3499	27886567
A07	A07_27886574	51.3499	27886574
A07	A07_27887408	51.3499	27887408
A07	A07_27907125	51.3499	27907125
A07	A07_27886663	51.3499	27886663
A07	A07_27886691	51.3499	27886691
A07	A07_27886744	51.3499	27886744
A07	A07_27886768	51.3499	27886768
A07	A07_27886777	51.3499	27886777
A07	A07_27886299	51.8162	27886299
A07	A07_27886704	51.8162	27886704
A07	A07_27886721	51.8162	27886721
A07	A07_27886771	51.8162	27886771
A07	A07_27889649	52.7608	27889649
A07	A07_27889715	52.7608	27889715
A07	A07_27886407	52.7608	27886407
A07	A07_27886617	52.7608	27886617
A07	A07_27886628	52.7608	27886628
A07	A07_27886642	52.7608	27886642
A07	A07_27886709	52.7608	27886709
A07	A07_27923408	53.1105	27923408
A07	A07_27817071	53.5892	27817071
A07	A07_27864136	54.068	27864136
A07	A07_27809560	54.6196	27809560
A07	A07_27737587	56.2355	27737587
A07	A07_27737592	56.2355	27737592
A07	A07_27737594	56.2355	27737594
A07	A07_27804864	57.0013	27804864
A07	A07_27886749	57.7504	27886749
A07	A07_27973386	58.1888	27973386
A07	A07_28153303	62.1104	28153303
A07	A07_28153305	62.1104	28153305
A08	A08_23339781	0	23339781
A08	A08_23354620	1.07003	23354620
A08	A08_23354637	1.07003	23354637
A08	A08_23078597	3.2648	23078597
A08	A08_23102347	3.2648	23102347
A08	A08_23102993	3.2648	23102993
A08	A08_23103007	3.2648	23103007
A08	A08_23106666	3.2648	23106666
A08	A08_23108103	3.2648	23108103
A08	A08_23084885	3.61449	23084885
A08	A08_23087458	3.61449	23087458
A08	A08_23114018	3.96412	23114018
A08	A08_23114058	3.96412	23114058
A08	A08_23114265	3.96412	23114265
A08	A08_23104714	4.31377	23104714
A08	A08_23104966	4.31377	23104966
A08	A08_23105915	4.31377	23105915
A08	A08_23106074	4.31377	23106074
A08	A08_23120927	4.31377	23120927
A08	A08_23063371	5.01824	23063371
A08	A08_23062932	5.01824	23062932
A08	A08_23012796	6.69546	23012796
A08	A08_23012817	6.69546	23012817
A08	A08_23017980	7.51766	23017980
A08	A08_23017987	7.51766	23017987
A08	A08_23018113	7.51766	23018113
A08	A08_23018140	7.51766	23018140
A08	A08_23011864	8.22203	23011864
A08	A08_23011846	8.22203	23011846
A08	A08_23011855	8.22203	23011855
A08	A08_23011882	8.22203	23011882
A08	A08_23024594	8.57192	23024594
A08	A08_23024609	8.57192	23024609
A08	A08_23024633	8.57192	23024633
A08	A08_23024666	8.57192	23024666
A08	A08_23024634	8.92172	23024634
A08	A08_23024641	8.92172	23024641
A08	A08_23024687	8.92172	23024687
A08	A08_23024694	8.92172	23024694
A08	A08_23024551	9.27172	23024551
A08	A08_23024721	9.9769	23024721
A08	A08_22904408	11.1974	22904408
A08	A08_22904407	11.1974	22904407
A08	A08_22864745	12.8393	22864745
A08	A08_22864767	12.8393	22864767
A08	A08_22864783	12.8393	22864783
A08	A08_22895737	13.5441	22895737
A08	A08_22861510	13.8941	22861510
A08	A08_22861523	13.8941	22861523
A08	A08_22971755	15.6252	22971755
A08	A08_22916062	16.2637	22916062
A08	A08_22916083	16.2637	22916083
A08	A08_22916307	16.2637	22916307
A08	A08_22916384	16.2637	22916384
A08	A08_22838994	17.2988	22838994
A08	A08_22840460	17.2988	22840460
A08	A08_22840472	17.2988	22840472
A08	A08_22665484	20.0062	22665484
A08	A08_22665512	20.0062	22665512
A08	A08_22665522	20.0062	22665522
A08	A08_22623008	23.0061	22623008
A08	A08_22623032	23.0061	22623032
A08	A08_22623516	23.0061	22623516
A08	A08_22548338	24.8357	22548338
A08	A08_22548366	24.8357	22548366
A08	A08_22549521	26.284	22549521
A08	A08_21919635	36.4007	21919635
A08	A08_21813894	41.4291	21813894
A08	A08_21132152	53.9785	21132152
A08	A08_17959118	69.6887	17959118
A08	A08_17959107	69.6887	17959107
A08	A08_17959115	69.6887	17959115
A08	A08_17958896	72.5448	17958896
A08	A08_17958930	72.5448	17958930
A08	A08_17959173	74.3846	17959173
A08	A08_17961061	74.82	17961061
A08	A08_17955751	75.6696	17955751
A08	A08_17955769	76.0898	17955769
A08	A08_17955760	76.0898	17955760
A08	A08_17729629	76.9395	17729629
A08	A08_17648975	79.4818	17648975
A08	A08_18550995	90.4293	18550995
A08	A08_18205403	96.0271	18205403
A08	A08_17332899	101.902	17332899
A08	A08_17341205	102.726	17341205
A08	A08_17341212	102.726	17341212
A08	A08_17341288	102.726	17341288
A08	A08_15938710	108.981	15938710
A08	A08_15917217	110.413	15917217
A08	A08_15841808	111.12	15841808
A08	A08_15650511	112.926	15650511
A08	A08_15650534	112.926	15650534
A08	A08_15650536	112.926	15650536
A08	A08_15740603	115.099	15740603
A08	A08_15740612	115.099	15740612
A08	A08_15740621	115.099	15740621
A08	A08_15904403	117.358	15904403
A08	A08_16681470	120.797	16681470
A08	A08_15434761	125.1	15434761
A08	A08_15434764	125.1	15434764
A08	A08_15319874	126.165	15319874
A08	A08_15037544	126.516	15037544
A08	A08_14932889	128.065	14932889
A08	A08_14735553	129.536	14735553
A08	A08_14546000	130.872	14546000
A08	A08_14467654	132.983	14467654
A08	A08_14289530	134.908	14289530
A08	A08_13543579	140.11	13543579
A08	A08_12618715	144.44	12618715
A08	A08_12618716	144.44	12618716
A08	A08_12783810	145.523	12783810
A08	A08_12781545	146.733	12781545
A08	A08_11672526	149.489	11672526
A08	A08_11044375	152.421	11044375
A08	A08_11044380	152.421	11044380
A08	A08_11063336	152.421	11063336
A08	A08_11063349	152.421	11063349
A08	A08_11107973	153.485	11107973
A08	A08_11105253	153.835	11105253
A08	A08_11105295	154.501	11105295
A08	A08_10160670	157.397	10160670
A08	A08_10160707	157.397	10160707
A08	A08_10431828	158.369	10431828
A08	A08_10603118	160.963	10603118
A08	A08_10636923	164.285	10636923
A08	A08_10636966	164.285	10636966
A08	A08_10731493	165.759	10731493
A08	A08_11115171	167.59	11115171
A08	A08_9648120	170.579	9648120
A08	A08_9648112	170.579	9648112
A08	A08_8537378	171.404	8537378
A08	A08_7822594	171.874	7822594
A08	A08_7822619	171.874	7822619
A08	A08_7822640	171.874	7822640
A08	A08_7016354	172.796	7016354
A08	A08_3611785	176.118	3611785
A08	A08_3611799	176.118	3611799
A08	A08_3611801	176.118	3611801
A08	A08_4288606	185.404	4288606
A08	A08_1435971	195.045	1435971
A08	A08_1471255	196.765	1471255
A08	A08_1471271	196.765	1471271
A08	A08_704690	198.907	704690
A08	A08_1017070	203.678	1017070
A09	A09_49059597	0	49059597
A09	A09_409408	50.5198	409408
A09	A09_483027	58.5803	483027
A09	A09_1260958	67.842	1260958
A09	A09_1260972	67.842	1260972
A09	A09_1290031	68.2547	1290031
A09	A09_1284760	68.2547	1284760
A09	A09_1284792	68.2547	1284792
A09	A09_1527172	71.866	1527172
A09	A09_1720525	74.9159	1720525
A09	A09_1736911	75.298	1736911
A09	A09_1736960	75.298	1736960
A09	A09_1591576	79.6104	1591576
A09	A09_1591738	79.6104	1591738
A09	A09_1591737	80.3539	1591737
A09	A09_1591750	80.3539	1591750
A09	A09_2057030	85.7014	2057030
A09	A09_2054623	87.7199	2054623
A09	A09_2054716	87.7199	2054716
A09	A09_2054701	89.4082	2054701
A09	A09_2269382	94.3281	2269382
A09	A09_2389555	95.9179	2389555
A09	A09_2389649	95.9179	2389649
A09	A09_2739744	99.039	2739744
A09	A09_3421126	103.24	3421126
A09	A09_4283460	110.352	4283460
A09	A09_4282056	111.102	4282056
A09	A09_4279177	111.378	4279177
A09	A09_4284572	111.971	4284572
A09	A09_4282135	111.971	4282135
A09	A09_4286842	112.393	4286842
A09	A09_4319082	114.196	4319082
A09	A09_4319088	114.196	4319088
A09	A09_4466271	115.984	4466271
A09	A09_4322403	118.149	4322403
A09	A09_5111823	123.992	5111823
A09	A09_5111884	123.992	5111884
A09	A09_5179840	127.325	5179840
A09	A09_5218593	127.325	5218593
A09	A09_5180951	127.852	5180951
A09	A09_5192787	128.378	5192787
A09	A09_5192828	128.378	5192828
A09	A09_5178734	128.728	5178734
A09	A09_5315307	129.433	5315307
A09	A09_5325346	129.433	5325346
A09	A09_5325491	129.433	5325491
A09	A09_5319161	129.782	5319161
A09	A09_5325019	129.782	5325019
A09	A09_5320452	129.782	5320452
A09	A09_5357316	130.631	5357316
A09	A09_5459375	131.901	5459375
A09	A09_5438139	131.901	5438139
A09	A09_5439015	134.222	5439015
A09	A09_5568768	136.485	5568768
A09	A09_5569079	137.077	5569079
A09	A09_5569180	137.077	5569180
A09	A09_5660978	140.377	5660978
A09	A09_5661001	140.377	5661001
A09	A09_5795006	140.814	5795006
A09	A09_5801822	140.814	5801822
A09	A09_5801866	140.814	5801866
A09	A09_5793138	142.153	5793138
A09	A09_5792984	142.153	5792984
A09	A09_5793010	142.153	5793010
A09	A09_5793021	142.327	5793021
A09	A09_5793213	142.501	5793213
A09	A09_5793163	142.501	5793163
A09	A09_5616794	144.661	5616794
A09	A09_5605343	146.639	5605343
A09	A09_5952442	150.864	5952442
A09	A09_5987701	152.804	5987701
A09	A09_5973353	153.928	5973353
A09	A09_6036285	154.633	6036285
A09	A09_6036310	154.633	6036310
A09	A09_6037385	154.633	6037385
A09	A09_6077655	155.525	6077655
A09	A09_6218228	156.076	6218228
A09	A09_6343922	156.727	6343922
A09	A09_6322164	156.727	6322164
A09	A09_6023021	157.379	6023021
A09	A09_6435341	158.182	6435341
A09	A09_6472202	158.182	6472202
A09	A09_6473693	158.182	6473693
A09	A09_6472370	158.182	6472370
A09	A09_7119574	160.741	7119574
A09	A09_7111426	161.092	7111426
A09	A09_7104552	161.51	7104552
A09	A09_7168066	163.298	7168066
A09	A09_11840962	174.434	11840962
A09	A09_11843819	174.434	11843819
A09	A09_11893076	174.434	11893076
A09	A09_11840944	175.011	11840944
A09	A09_11892958	175.588	11892958
A09	A09_11892952	175.588	11892952
A09	A09_11893069	175.938	11893069
A09	A09_11893089	175.938	11893089
A09	A09_11892898	175.938	11892898
A09	A09_11892906	175.938	11892906
A09	A09_11843393	176.287	11843393
A09	A09_11843423	176.287	11843423
A09	A09_11844308	176.287	11844308
A09	A09_11844230	176.639	11844230
A09	A09_13899596	181.86	13899596
A09	A09_16668082	188.609	16668082
A09	A09_16668388	189.191	16668388
A09	A09_16578073	190.377	16578073
A09	A09_16849868	191.543	16849868
A09	A09_16849880	191.543	16849880
A09	A09_17021176	192.402	17021176
A09	A09_17020962	192.402	17020962
A09	A09_43220169	193.833	43220169
A09	A09_43220179	193.833	43220179
A09	A09_44722115	194.539	44722115
A09	A09_44722177	194.539	44722177
A09	A09_44722181	194.539	44722181
A09	A09_45559272	194.782	45559272
A09	A09_44368128	197.134	44368128
A09	A09_44449503	198.707	44449503
A09	A09_46924274	200.589	46924274
A09	A09_46924214	200.589	46924214
A09	A09_46924203	200.589	46924203
A09	A09_46806592	200.896	46806592
A09	A09_46924166	200.896	46924166
A09	A09_46922828	201.245	46922828
A09	A09_46922824	201.245	46922824
A09	A09_47126138	201.595	47126138
A09	A09_47132468	202.401	47132468
A09	A09_47515705	204.046	47515705
A09	A09_47439690	204.446	47439690
A09	A09_47773273	204.446	47773273
A09	A09_47750507	204.951	47750507
A09	A09_47510459	205.529	47510459
A09	A09_48819826	209.191	48819826
A09	A09_48853221	209.191	48853221
A09	A09_48820149	209.191	48820149
A09	A09_48842122	209.541	48842122
A09	A09_48853048	209.541	48853048
A09	A09_48967454	210.606	48967454
A09	A09_48936071	210.956	48936071
A09	A09_49099006	211.357	49099006
A09	A09_49299243	213.662	49299243
A09	A09_49324242	215.775	49324242
A09	A09_49702270	219.531	49702270
A09	A09_49866615	220.715	49866615
A09	A09_50614807	224.021	50614807
A09	A09_50558016	224.238	50558016
A09	A09_50942575	225.008	50942575
A09	A09_50453425	225.358	50453425
A09	A09_50942489	225.358	50942489
A09	A09_50942497	225.358	50942497
A09	A09_50238250	226.523	50238250
A09	A09_51166169	228.5	51166169
A09	A09_51822305	233.235	51822305
A09	A09_51877439	233.235	51877439
A09	A09_51880338	233.811	51880338
A09	A09_51880352	233.811	51880352
A09	A09_51787455	234.409	51787455
A09	A09_52736112	234.945	52736112
A09	A09_51874399	236.188	51874399
A09	A09_53344508	238.261	53344508
A09	A09_53326320	238.836	53326320
A09	A09_53712332	240.212	53712332
A09	A09_55137946	241.6	55137946
A09	A09_55521252	242.053	55521252
A09	A09_54975156	242.97	54975156
A09	A09_54972855	242.97	54972855
A09	A09_54975198	242.97	54975198
A09	A09_55583460	243.622	55583460
A09	A09_55760551	244.856	55760551
A09	A09_55219831	245.833	55219831
A09	A09_55241258	246.498	55241258
A09	A09_55241264	246.498	55241264
A09	A09_55256555	248.473	55256555
A09	A09_55256625	248.473	55256625
A09	A09_54284337	251.915	54284337
A09	A09_54844083	253.106	54844083
A09	A09_54848197	253.352	54848197
A09	A09_54848241	253.352	54848241
A09	A09_54848220	253.352	54848220
A09	A09_54851562	254.056	54851562
A09	A09_54851584	254.056	54851584
A09	A09_54851720	254.056	54851720
A09	A09_54846203	254.583	54846203
A09	A09_54847894	254.583	54847894
A09	A09_54851704	254.583	54851704
A09	A09_54846500	255.109	54846500
A09	A09_54846546	255.109	54846546
A09	A09_54909787	257.206	54909787
A09	A09_54226847	258.195	54226847
A09	A09_55034329	258.195	55034329
A09	A09_55034347	258.195	55034347
A09	A09_54970907	258.545	54970907
A09	A09_54976703	258.545	54976703
A09	A09_54979140	258.545	54979140
A09	A09_55006529	258.895	55006529
A09	A09_55081259	258.895	55081259
A09	A09_54931867	259.244	54931867
A09	A09_55081481	259.244	55081481
A09	A09_54933108	259.594	54933108
A09	A09_55080992	259.594	55080992
A09	A09_54907543	260.134	54907543
A09	A09_54930615	260.134	54930615
A09	A09_54311505	260.674	54311505
A09	A09_54320603	260.674	54320603
A09	A09_54322313	260.674	54322313
A09	A09_54316191	261.024	54316191
A09	A09_54316269	261.024	54316269
A09	A09_55626297	262.19	55626297
A09	A09_54875727	263.715	54875727
A09	A09_54935173	264.697	54935173
A09	A09_55076761	264.697	55076761
A09	A09_55792969	266.652	55792969
A09	A09_55845262	268.972	55845262
A09	A09_55973892	271.487	55973892
A09	A09_56320818	272.92	56320818
A09	A09_56436460	273.625	56436460
A09	A09_56438813	274.33	56438813
A09	A09_56438854	274.33	56438854
A09	A09_56438908	274.473	56438908
A09	A09_56514679	275.687	56514679
A09	A09_56514702	275.687	56514702
A09	A09_56598168	277.489	56598168
A09	A09_56604546	277.489	56604546
A09	A09_56781907	277.85	56781907
A09	A09_56815511	278.587	56815511
A09	A09_57563461	288.566	57563461
A09	A09_58338815	293.128	58338815
A09	A09_58338822	293.128	58338822
A09	A09_58287756	295.996	58287756
A09	A09_59564239	304.982	59564239
A09	A09_61618862	317.334	61618862
A09	A09_61902278	319.861	61902278
A09	A09_61902245	320.255	61902245
A09	A09_61902308	320.649	61902308
A09	A09_62532876	324.005	62532876
A09	A09_62518379	325.442	62518379
A09	A09_63500964	337.738	63500964
A09	A09_63500469	338.483	63500469
A10	A10_96585	0	96585
A10	A10_751002	4.42516	751002
A10	A10_786340	4.78383	786340
A10	A10_750684	5.37958	750684
A10	A10_679925	6.3372	679925
A10	A10_1129590	15.3295	1129590
A10	A10_1343752	18.7923	1343752
A10	A10_1343757	18.7923	1343757
A10	A10_1797004	22.113	1797004
A10	A10_2109071	25.4373	2109071
A10	A10_2109147	25.4373	2109147
A10	A10_9769559	30.7558	9769559
A10	A10_9234917	31.1875	9234917
A10	A10_9201529	31.7144	9201529
A10	A10_8171473	32.2408	8171473
A10	A10_8169106	32.2418	8169106
A10	A10_9611592	32.9633	9611592
A10	A10_2891912	35.1584	2891912
A10	A10_2876464	35.9172	2876464
A10	A10_10636368	37.6986	10636368
A10	A10_10627366	38.0152	10627366
A10	A10_11063623	38.9449	11063623
A10	A10_11543853	41.4583	11543853
A10	A10_11543884	42.5067	11543884
A10	A10_12432394	45.8537	12432394
A10	A10_12434084	45.8537	12434084
A10	A10_12434160	45.8537	12434160
A10	A10_12451126	46.2034	12451126
A10	A10_12451150	46.2034	12451150
A10	A10_12451149	46.2034	12451149
A10	A10_12450703	47.1581	12450703
A10	A10_12466938	47.5719	12466938
A10	A10_13149741	51.6687	13149741
A10	A10_13149750	51.6687	13149750
A10	A10_13148370	53.7842	13148370
A10	A10_13152967	53.7842	13152967
A10	A10_12921191	54.191	12921191
A10	A10_12921258	54.191	12921258
A10	A10_13136389	54.5409	13136389
A10	A10_13138148	54.5409	13138148
A10	A10_13151563	54.8906	13151563
A10	A10_13380143	54.8906	13380143
A10	A10_13466918	56.1878	13466918
A10	A10_14381134	58.4237	14381134
A10	A10_14381853	58.4237	14381853
A10	A10_14367747	59.9144	14367747
A10	A10_14367720	60.2829	14367720
A10	A10_14423163	61.8005	14423163
A10	A10_13848258	65.7664	13848258
A10	A10_14753808	66.3554	14753808
A10	A10_14753756	67.5217	14753756
A10	A10_14806851	67.5217	14806851
A10	A10_16793020	73.4569	16793020
A10	A10_17156975	77.1277	17156975
A10	A10_17208169	80.0088	17208169
A10	A10_17482536	83.3018	17482536
A10	A10_18053318	87.6928	18053318
A10	A10_18053335	87.6928	18053335
A10	A10_17928099	89.3888	17928099
A10	A10_18371814	93.7932	18371814
A10	A10_19544588	105.506	19544588
A10	A10_19895060	110.239	19895060
A10	A10_19895081	110.239	19895081
A10	A10_20004683	110.624	20004683
A10	A10_20135395	113.929	20135395
A10	A10_20135401	113.929	20135401
A10	A10_20136557	115.054	20136557
A10	A10_20136706	115.054	20136706
A10	A10_20521365	119.833	20521365
A10	A10_20747670	122.511	20747670
A10	A10_20835640	123.815	20835640
A10	A10_21099708	127.604	21099708
A10	A10_21099830	127.977	21099830
A10	A10_21012808	138.887	21012808
A10	A10_21475363	155.302	21475363
A10	A10_21555202	156.013	21555202
A10	A10_21540658	156.013	21540658
A10	A10_21555120	156.702	21555120
A10	A10_21555182	156.702	21555182
A10	A10_21555239	156.801	21555239
A10	A10_21567098	157.747	21567098
A10	A10_21567501	157.747	21567501
A10	A10_21587664	159.858	21587664
A10	A10_21587680	159.858	21587680
A10	A10_21727172	162.879	21727172
A10	A10_21732655	162.879	21732655
A10	A10_22564124	169.957	22564124
A10	A10_22837283	172.58	22837283
A10	A10_22986819	173.881	22986819
A10	A10_22990079	174.314	22990079
A10	A10_23006435	174.314	23006435
A10	A10_23024390	174.609	23024390
A10	A10_23023933	175.496	23023933
A10	A10_23018625	176.856	23018625
A10	A10_22781489	178.911	22781489

## Sheet: Table S4 
Table S4 The summary of genetic linkage map
Linkage_group (Chr)	Chr_length	SNP_detected	SNP_mapped	Map_length	ave.spacing	max.spacing
A01	38126442	722047	170	292.4	1.7	22.7
A02	33817099	753934	164	227.2	1.4	10.6
A03	41214576	779968	103	283.7	2.8	34.6
A04	23891077	530781	51	130	2.6	17.4
A05	42748514	794914	108	227.9	2.1	20
A06	43549656	897224	485	349.7	0.7	7.4
A07	29241068	616408	60	62.1	1.1	14.5
A08	23546603	559964	144	203.7	1.4	15.7
A09	64520918	1276206	238	338.5	1.4	50.5
A10	23121789	433993	95	178.9	1.9	16.4
Ave		736544	161.8	229.41	1.4	20.98
Sum		7365439	1618	2294.1	1.4	50.5

## Sheet: Table S5 
Table S5 Quantitative trait loci (QTL) for leaf-related traits detected in RIL population using CIM method
Traits	Environment	QTL	Linkage_group	Peak position(cM)	Peak marker	Genetic interval(cM)	Physical interval(bp)	LOD	Additive_effect	var%	F_value	Pvalue(Chi2)	Pvalue(F)
LL	Baima	qLL.9.1	A09	255	A09_54846500	251.92-257.21	54284337-54909787	4.59413	1.0445	0.1064	10.15	0	7.72e-05	***
LL	Baima	qLL.10.1	A10	64	A10_13848258	61.8-66.36	14423163-14753808	5.25646	0.8739	0.1601	15.27	0	1.02e-06	***
LL	Huzhou	qLL.9.2	A09	236	A09_51874399	228.5-238.26	51166169-53344508	12.6541	0.9295	0.2716		1.44363e-10	2.3222e-10	***
LL	BLUP	qLL.9.2	A09	234	A09_51787455	228.5-238.26	51166169-53344508	9.25839	0.5127	0.210348		4.12468e-08	5.87809e-08	***
LW	Baima	qLW.9.1	A09	259	A09_54979140	258.2-258.895	54979140-55034347	9.47	0.6077	0.0885556		0.00132041	0.00151745	**
LW	Huzhou	qLW.1.1	A01	26	A01_1114015	19.48-35.20	989993-1872968	4.86641	0.5785	0.09799	12.04	0	1.54e-05	***
LW	Huzhou	qLW.6.1	A06	306	A06_39799439	302.56-308.15	39464218-40133203	5.86186	0.5885	0.1159	14.24	0	2.43e-06	***
LW	Huzhou	qLW.9.2	A09	204	A09_47515705	202.4016-205.5288	47132468-47510459	10.1528	0.6813	0.21158	25.99	0	2.76e-10	***
LW	BLUP	qLW.6.2	A06	289	A06_37966344	287.492-290.5821	37994746-37994793	4.90565	0.28235	0.1121	11.99	0	1.57e-05	***
LW	BLUP	qLW.9.2	A09	204	A09_47515705	202.4016-205.5288	47132468-47510459	10.2694	0.4419	0.2101	22.47	0	3.51e-09	***
LS	Baima	qLS.3.1	A03	32	A03_28571158	30.9917-32.67531	28309949-28571158	8.53441	-0.16158	0.09935	9.88	0	9.77e-05	***
LS	Baima	qLS.4.1	A04	13	A04_4135569	0-13.22851	4135569 -4221964	6.75208	-0.19531	0.14551	14.47	0	1.97e-06	***
LS	Huzhou	qLS.4.1	A04	16	A04_4052077	10.62462-24.93579	4676839-13960200	7.93878	-0.21966	0.168561		1.85304e-06	2.44421e-06	***
LS	BLUP	qLS.4.1	A04	15	A04_4052077	0-15.33323	4052077-4221964	6.87643	-0.17715	0.198223		1.23552e-07	1.72096e-07	***
LPLI	Huzhou	qLPLI.6.1	A06	114	A06_9114145	111.6521-116.8251	9114145-10250895	6.6224	0.18685	0.162769		3.04405e-06	3.97359e-06	***
LPLI	BLUP	qLPLI.9.1	A09	157	A09_6322164	155.5247-158.1822	6023021-6435341	6.93732	-0.04904	0.111678		0.000198177	0.0002367	***
PL	Huzhou	qPL.8.1	A08	118	A08_15904403	112.9256-120.7969	15650536-16681470	5.79904	-0.6908	0.1031	10.95	0	3.87e-05	***
PL	Huzhou	qPL.9.1	A09	274	A09_56438813	271.487-275.6874	55973892-56514679	10.0848	-2.1411	0.2256	23.95	0	1.18e-09	***
PL	BLUP	qPL.8.2	A08	172	A08_7822640	171.4044-172.7959	7016354-8537378	6.13855	-0.30342	0.1388	13.95	0	3.01e-06	***
PL	BLUP	qPL.9.2	A09	245	A09_55760551	243.6222-246.4983	55241258-55583460	10.6262	0.46369	0.2028	20.38	0	1.73e-08	***
PW	Baima	qPW.1.1	A01	237	A01_33849624	234.4222-240.1689	33706868-34001075	8.88276	0.1497	0.163526		3.11971e-06	4.07789e-06	***
PW	Huzhou	qPW.1.2	A01	150	A01_30296803	140.0755-155.0015	28431036-30881834	8.4869	0.15757	0.202579		9.3472e-08	1.31265e-07	***
PS	Huzhou	qPS.1.1	A01	227.5	A01_33594271	224.3572-231.473	33503602-33602028	5.72734	-0.497	0.1651	16.75	0	3.07e-07	***
PS	Huzhou	qPS.8.1	A08	76.1	A08_17955760	72.54486-79.48189	17955760-17648975	6.12643	-0.53986	0.1591	16.14	0	5.01e-07	***
PS	BLUP	qPS.1.1	A01	228	A01_33513875	224.3572-231.473	33503602-33602028	7.97771	-0.4086	0.2124	21.08	0	1.03e-08	***
PS	BLUP	qPS.8.2	A08	126	A08_15319874	120.7969-128.0647	14932889-16681470	7.08267	-0.3282	0.1344	13.34	0	5.07e-06	***
LFW	Baima	qLFW.9.1	A09	259	A09_55081259	258.1957-258.895	54979140-55034347	8.72218	1.298	0.0866954		0.0015985	0.00183142	***
LFW	Huzhou	qLFW.9.2	A09	74.9	A09_1720525	71.86596-75.29802	1527172-1736911	9.68557	0.4388	0.2459		1.72259e-09	2.6305e-09	***
LFW	BLUP	qLFW.9.1	A09	259	A09_54931867	71.86596-258.895	1527172-55006529	7.21423	0.4042	0.0933785		0.000860348	0.000996633	***
PFW	Huzhou	qPFW.9.1	A09	233	A09_51822305	228.5003-234.9453	51166169-52736112	10.1495	0.9868	0.227279		9.85417e-09	1.45073e-08	***
PFW	BLUP	qPFW.9.2	A09	259	A09_54931867	258.1957-258.895	54979140-55034347	20.5478	0.5251	0.0752484		0.00357938	0.00402504	***
PFWI	Huzhou	qPFWI.9.1	A09	277.49	A09_56598168	272.9204-278.5876	56320818-56815511	8.28481	0.029607	0.1727	17.91	0	1.22e-07	***
PFWI	Huzhou	qPFWI.10.1	A10	5.38	A10_750684	0-15.32951	96585-1129590	5.79408	0.024156	0.1102	11.43	0	2.55e-05	***
PFWI	BLUP	qPFWI.9.1	A09	280	A09_56815511	275.6874-288.5661	56514702-57563461	6.78191	0.012025	0.1651	16.59	0	3.45e-07	***
PFWI	BLUP	qPFWI.10.1	A10	17	A10_1129590	6.337199-18.792343	679925-1343752	5.51986	0.0115113	0.1411	14.18	0	2.49e-06	***
*, **, and *** represent significance at 5% ,1% and 0.1% respectively.

## Sheet: Table S6
Table S6 Quantitative trait loci (QTL) for leaf-related traits detected in RIL population using MQM method
Traits	Environment	QTL	Linkage_group	Peak position(cM)	Peak marker	Genetic interval(cM)	Physical interval(bp)	LOD	Additive_effect	var%	F_value	Pvalue(Chi2)	Pvalue(F)
LL	BLUP	qLL.9.1	A09	254	A09_54851562	240.21-263.72	53712332-54875727	6.14053	0.7043	0.198404		1.2156e-07	1.69379e-07	***
LW	Huzhou	qLW.6.1	A06	316	A06_40667734	305.90-327.49	39799439-41942840	4.96	0.6076	0.1268	12.97	0	6.91e-06	***
		qLW.9.2	A09	200	A09_46924274	190.38-266.65	16578073-55792969	6.03191	0.7644	0.1551	15.86	0	6.33e-07	***
	BLUP	qLW.9.2	A09	200	A09_46924274	190.38-268.97	16578073-55845262	5.95262	0.50868	0.192684		2.02829e-07	2.79617e-07	***
LPLI	Huzhou	qLPLI.6.1	A06	114	A06_9114145	111.65-242.03	9114145-35634104	4.61887	0.18685	0.162769		3.04405e-06	3.97359e-06	***
PL	Huzhou	qPL.9.1	A09	275	A09_56438908	233.23-288.57	51877439-57563461	7.43375	1.1613	0.247382		1.4965e-09	2.292e-09	***
	BLUP	qPL.9.1	A09	275	A09_56438908	233.23-288.57	51877439-57563461	6.08431	0.45912	0.199228		1.12883e-07	1.5753e-07	***
PS	Huzhou	qPS.8.1	A08	76	A08_17955769	72.54-129.54	14735553-17958930	4.87537	-0.529	0.149871		9.08184e-06	1.15863e-05	***
PFWI	Huzhou	qPFWI.9.1	A09	278	A09_56781907	268.97-288.57	55845262-57563461	6.15401	0.029	0.157	15.87	0	6.25e-07	**
		qPFWI.10.1	A10	5	A10_786340	0-15.33	96585-1129590	4.78538	0.025	0.118	11.93	0	1.66e-05	**
	BLUP	qPFWI.9.1	A09	273	A09_56320818	268.97-288.57	55845262-57563461	4.76537	0.010037	0.1138	11.01	0	3.64e-05	***
		qPFWI.10.1	A10	10	A10_679925	1.99 -3.10	96585-1797004	5.11287	0.011777	0.1309	12.66	0	8.87e-06	***
*, **, and *** represent significance at 5% ,1% and 0.1% respectively.

## Sheet: Table S7
Table S7 Candidate genes that may be associated with leaf-related traits
QTL	Gene ID in Brassica campestris	Homologue in Arabidopsis	Gene name	Gene Model Description	Pathway/Module	Reference
qLL.9.2	BraC09g051900	AT2G36985	ROT4(ROTUNDIFOLIA4)	Encodes ROTUNDIFOLIA4, a member of the seed plant-specific family of small peptides, RTFL (ROT FOUR LIKE), characterised by the presence of a 29-amino acid domain: RTF. Expressed in shoot apices, young leaves and flowers. Involved in controlling polarity-dependent cell proliferation.		Ikeuchi et al, 2011	ROTUNDIFOLIA4 Regulates Cell Proliferation Along the Body Axis in Arabidopsis Shoot
qLL.9.2	BraC09g051940	AT3G53250	SAUR57(SMALL AUXIN UPREGULATED RNA 57)	SAUR-like auxin-responsive protein family	auxin	Spartz et al, 2012;Deng et al, 2019	The SAUR19 subfamily of SMALL AUXIN UP RNA genes promote cell expansion;Identification and expression of SAUR genes in the CAM plant Agave
qPFW.9.1&qLL.9.2	BraC09g050650	AT3G50630	KRP2(KIP-RELATED PROTEIN 2)	Kip-related protein (KRP) gene, encodes CDK (cyclin-dependent kinase) inhibitor (CKI), negative regulator of cell division. A member of seven KRP genes found in Arabidopsis thaliana. Differential expression patterns for distinct KRPs were revealed by in situ hybridization. Gene was isolated from a yeast two hybrid screen as an interacting protein of CDC2A. Recombinant protein has a strong kinase …	Cell cycle machinery	Cheng et al, 2013	Downregulation of multiple CDK inhibitorICK/KRP genes upregulates the E2F pathway and increases cell proliferation, and organ and seed sizes in Arabidopsis
qPFW.9.1&qLL.9.2	BraC09g051590	AT3G52910	GRF4(GROWTH-REGULATING FACTOR 4)	Growth regulating factor encoding transcription activator. One of the nine members of a GRF gene family, containing nuclear targeting domain. Involved in leaf development and expressed in root, shoot and flower.	GRF–GIF	Lee et al, 2009	The Arabidopsis GRF-INTERACTING FACTOR Gene Family Performs an Overlapping Function in Determining Organ Size as Well as Multiple Developmental Properties
qLW.1.1	BraC01g001950	AT4G36860	DAR1(DA1-RELATED PROTEIN 1)	DAR1 is a member of a small (7 member) ubiquitin binding protein family. It appears to play a role in regulation of endoreduplication in leaf epidermal tissue.	DA1-EOD1	Peng et al, 2015	The Ubiquitin Receptors DA1, DAR1, and DAR2 Redundantly Regulate Endoreduplication by Modulating the Stability of TCP14/15 in Arabidopsis
qLW.1.1	BraC01g002470	AT4G36110	SAUR9(SMALL AUXIN UPREGULATED RNA 9)	SAUR-like auxin-responsive protein family	auxin	Spartz et al, 2012;Deng et al, 2019	The SAUR19 subfamily of SMALL AUXIN UP RNA genes promote cell expansion;Identification and expression of SAUR genes in the CAM plant Agave
qLW.1.1	BraC01g003510	AT4G34750	SAUR49(SMALL AUXIN UPREGULATED RNA 49)	SAUR-like auxin-responsive protein family	auxin	Spartz et al, 2012;Deng et al, 2019	The SAUR19 subfamily of SMALL AUXIN UP RNA genes promote cell expansion;Identification and expression of SAUR genes in the CAM plant Agave
qLS.4.1	BraC04g006480	AT4G22910	CCS52A1(CELL CYCLE SWITCH PROTEIN 52 A1)	Encodes an activator of an E3 ubiquitin ligase, anaphase-promoting complex/cyclosome (APC/C) that promotes entry into the endocycle.	Cell cycle machinery	Baloban et al, 2013	Complementary and dose-dependent action of AtCCS52A isoforms in endoreduplication and plant size control
qLS.4.1	BraC04g007040	AT3G52910	GRF4(GROWTH-REGULATING FACTOR 4)	Growth regulating factor encoding transcription activator. One of the nine members of a GRF gene family, containing nuclear targeting domain. Involved in leaf development and expressed in root, shoot and flower.	GRF–GIF	Lee et al, 2009	The Arabidopsis GRF-INTERACTING FACTOR Gene Family Performs an Overlapping Function in Determining Organ Size as Well as Multiple Developmental Properties
qLS.4.1	BraC04g007910	AT1G65800	RK2(RECEPTOR KINASE 2)	Encodes a putative receptor-like serine/threonine protein kinases that is similar to brassica self-incompatibility (S) locus. expressed in specifically in cotyledons, leaves, and sepals, in correlation with the maturation of these structures. Together with AtPUB9, it is required for auxin-mediated lateral root development under phosphate-starved conditions. The mRNA is cell-to-cell mobile.	auxin	Sankaranarayanan et al, 2015	A proposed role for selective autophagy in regulating auxin-dependent lateral root development under phosphate starvation in Arabidopsis
qLS.4.1	BraC04g014700	AT2G04660	APC2(ANAPHASE-PROMOTING COMPLEX/CYCLOSOME 2)	a highly conserved ubiquitin-protein ligase involved in cell cycle regulation	Cell cycle machinery	Eloy et al, 2011	GIGAS CELL1, a Novel Negative Regulator of the Anaphase-Promoting Complex/Cyclosome, Is Required for Proper Mitotic Progression and Cell Fate Determination in Arabidopsis
qLS.4.1	BraC04g015220	AT5G40460	SMR6(SIAMESE-RELATED 6)	SIAMESE-RELATED (SMR) family gene; activated by SMOS1/SCL28 heterodimer thus inhibiting cell cycle progression at G2 and promoting the onset of endoreplication.	Cell cycle machinery	Michelle L et al, 2006	SIAMESE, a plantspecific cell cycle regulator, controls endoreplication onset in Arabidopsis thaliana
qLPLI.6.1	BraC06g016490	AT1G21380	TOL3(TOM1-LIKE 3)	Encodes a member of the Arabidopsis TOL (TOM1-LIKE) family of ubiquitin binding proteins that acts redundantly in the recognition and further endocytic sorting of a PIN-FORMED (PIN)-type auxin carrier protein at the plasma membrane, modulating dynamic auxin distribution and associated growth responses.	auxin	Barbara et al, 2013	Arabidopsis TOL Proteins Act as Gatekeepers for Vacuolar Sorting of PIN2 Plasma Membrane Protein
qLPLI.6.1	BraC06g016780	AT1G21700	SWI3C(SWITCH/SUCROSE NONFERMENTING 3C)	Member of the Arabidopsis SWI3 gene family. Protein physically interacts with ATSWI3B and ATSWI3A, the other two members of the SWI3 family. Homologous to yeast SWI3 & RSC8, components of the SWI/SNF and RSC chromatin remodeling complexes. Identified as a specific subunit of BRM-associated SWI/SNF (BAS) complexes (PMID:36471048). Also referred to as CHB3 in Zhou et al (2003).	SWI/SNF	Vercruyssen et al, 2014	ANGUSTIFOLIA3 Binds to SWI/SNF Chromatin Remodeling Complexes to Regulate Transcription during Arabidopsis Leaf Development
qLPLI.6.1	BraC06g017160	AT1G21380	TOL3(TOM1-LIKE 3)	Encodes a member of the Arabidopsis TOL (TOM1-LIKE) family of ubiquitin binding proteins that acts redundantly in the recognition and further endocytic sorting of a PIN-FORMED (PIN)-type auxin carrier protein at the plasma membrane, modulating dynamic auxin distribution and associated growth responses.	auxin	Barbara et al, 2013	Arabidopsis TOL Proteins Act as Gatekeepers for Vacuolar Sorting of PIN2 Plasma Membrane Protein
qLPLI.6.1	BraC09g010470	AT2G17800	ROP3(RHO-RELATED GTPASES FROM PLANTS 3)	A member of ROP GTPase family. Rac-like GTP-binding protein ARAC1/ATGP2. Encodes a geranylgeranylated GTP binding protein. Involved in the auxin-activated 26S proteasome-dependent Aux/IAA proteolysis pathway.	auxin	Huang et al, 2014	ROP3 GTPase Contributes to Polar Auxin Transport and Auxin Responses and Is Important for Embryogenesis and Seedling Growth in Arabidopsis
qLPLI.6.1	BraC09g010520	AT2G18010	SAUR10(SMALL AUXIN UPREGULATED RNA 10)	SAUR-like auxin-responsive protein family	auxin	Spartz et al, 2012;Deng et al, 2019	The SAUR19 subfamily of SMALL AUXIN UP RNA genes promote cell expansion;Identification and expression of SAUR genes in the CAM plant Agave
qPL.9.1&qPFWI.9.1	BraC09g057880	AT3G59900	ARGOS(AUXIN-REGULATED GENE INVOLVED IN ORGAN SIZE)	Encodes ARGOS (Auxin-Regulated Gene Involved in Organ Size). Inducible by auxin. Involved in lateral organ size control. Transgenic plants expressing sense or antisense ARGOS cDNA display enlarged or reduced aerial organs, respectively. The alteration in organ size is attributable mainly to changes in cell number and the duration of organ growth.	auxin	Wang et al, 2010	Ectopic expression of a Chinese cabbage BrARGOS gene in Arabidopsis increases organ size
qPL.9.2	BraC09g056020	AT3G57130	BOP1(BLADE ON PETIOLE 1)	Encodes BOP1. Contains Pfam domain, PF00023: Ankyrin repeat and Pfam domain, PF00651: BTB/POZ domain. Lines carrying recessive mutations exhibit a number of visible defects, most pronounced being ectopic outgrowths of in leaf petioles of rosette leaves. Along with BOP2, BOP1 is required for nectary development and formation of normal abscission zones.Forms homodimers and heterodimers with BOP2. N…		Hu et al, 2023	SQUAMOSA PROMOTER BINDING PROTEIN-LIKE 9 and 13 repress BLADE-ON-PETIOLE 1 and 2 directly to promote adult leaf morphology in Arabidopsis
qPL.8.1&qPS.8.2	BraC08g021310	AT4G36110	SAUR9(SMALL AUXIN UPREGULATED RNA 9)	SAUR-like auxin-responsive protein family	auxin	Spartz et al, 2012;Deng et al, 2019	The SAUR19 subfamily of SMALL AUXIN UP RNA genes promote cell expansion;Identification and expression of SAUR genes in the CAM plant Agave
qPW.1.2	BraC01g036690	AT3G20898	SMR13(SIAMESE-RELATED 13)	SIAMESE-RELATED (SMR) family gene; activated by SMOS1/SCL28 heterodimer thus inhibiting cell cycle progression at G2 and promoting the onset of endoreplication.	Cell cycle machinery	Churchman ML et al, 2006	SIAMESE, a plantspecific cell cycle regulator, controls endoreplication onset in Arabidopsis thaliana
qPS.8.1	BraC08g023640	AT4G38520	APD6(ARABIDOPSIS PP2C CLADE D 6)	Plasma membrane-associated protein phosphatase inhibited by SAUR3, thereby increasing the plasma membrane electrochemical potential, acidifying the apoplast, and stimulating cell expansion.	Cell expansion	Wong et al, 2019	Mutation of a conserved motif of PP2C.D phosphatases confers SAUR immunity and constitutive activity
qPT.1.1	BraC01g041240	AT3G15540	IAA19(INDOLE-3-ACETIC ACID INDUCIBLE 19)	Primary auxin-responsive gene. Involved in the regulation stamen filaments development.	auxin	Parameswari et al, 2016	Genome-Wide Analysis and characterization of Aux/IAA family genes in Brassica rapa
qLFW9.2	BraC09g002580	AT3G27630	SMR7(SIAMESE-RELATED 7)	SMR7 is a member of the SIAMESE-RELATED Cyclin-Dependent Kinase Inhibitor family. It is induced by ROS/oxidative stress.	Cell cycle machinery	Churchman ML et al, 2006	SIAMESE, a plantspecific cell cycle regulator, controls endoreplication onset in Arabidopsis thaliana
qPFWI.9.1	BraC09g058530	AT4G00100	RPS13A(RIBOSOMAL PROTEIN S13A)	Encodes a cytoplasmic ribosomal protein S13 homologue involved in early leaf development The mRNA is cell-to-cell mobile.		Ito et al, 2000	Disruption of an Arabidopsis cytoplasmic ribosomal protein S13‐homologous gene by transposon‐mediated mutagenesis causes aberrant growth and development
qPFWI.9.1	BraC09g059400	AT3G61830	ARF18(AUXIN RESPONSE FACTOR 18)	auxin response factor 18	auxin	Zhang et al, 2021	Genome-Wide Identification Analysis of the auxin response factors family in Nicotiana tabacum and the function of NtARF10 in leaf size regulation
qPFWI.9.1	BraC09g059410	AT3G61840	ARF(AUXIN RESPONSE FACTOR)	auxin response factor, putative (DUF688)	auxin	Zhang et al, 2021	Genome-Wide Identification Analysis of the auxin response factors family in Nicotiana tabacum and the function of NtARF10 in leaf size regulation
qPFWI.9.1	BraC09g059470	AT3G61890	HB12(HOMEOBOX 12)	Encodes a homeodomain leucine zipper class I (HD-Zip I) protein. Loss of function mutant has abnormally shaped leaves and stems.	Cell expansion	Hur et al, 2015	Arabidopsis thaliana homeobox 12 (ATHB12), a homeodomain-leucine zipper protein, regulates leaf growth by promoting cell expansion and endoreduplication
qPFWI.9.1	BraC09g059720	AT3G62100	IAA30(INDOLE-3-ACETIC ACID INDUCIBLE 30)	Encodes a member of the Aux/IAA family of proteins implicated in auxin signaling. IAA30 lacks the conserved degron (domain II) found in many family members. IAA30 transcripts are induced by auxin treatment and accumulate preferentially in the quiescent center cells of the root meristem. Overexpression of IAA30 leads to defects in gravitropism, root development, root meristem maintenance, and coty…	auxin	Parameswari et al, 2016	Genome-Wide Analysis and characterization of Aux/IAA family genes in Brassica rapa
qPFWI.10.1	BraC10g002600	AT1G04100	IAA10(INDOLEACETIC ACID-INDUCED PROTEIN 10)	Auxin induced gene, IAA10 (IAA10).	auxin	Parameswari et al, 2016	Genome-Wide Analysis and characterization of Aux/IAA family genes in Brassica rapa
